1 **Characteristic and quantifiable COVID-19-like abnormalities in CT- and PET/CT-**  
2 **imaged lungs of SARS-CoV-2-infected crab-eating macaques (*Macaca fascicularis*)**

3

4 *Courtney L. Finch<sup>1</sup>, Ian Crozier<sup>2</sup>, Ji Hyun Lee<sup>1</sup>, Russ Byrum<sup>1</sup>, Timothy K. Cooper<sup>1</sup>, Janie*  
5 *Liang<sup>1</sup>, Kaleb Sharer<sup>1</sup>, Jeffrey Solomon<sup>2</sup>, Philip J. Sayre<sup>1</sup>, Gregory Kocher<sup>1</sup>, Christopher*  
6 *Bartos<sup>1</sup>, Nina M. Aiosa<sup>1,3</sup>, Marcelo Castro<sup>1</sup>, Peter A. Larson<sup>4</sup>, Ricky Adams<sup>1</sup>, Brett*  
7 *Beitzel<sup>4</sup>, Nicholas Di Paola<sup>4</sup>, Jeffrey R. Kugelman<sup>4</sup>, Jonathan R. Kurtz<sup>1</sup>, Tracey*  
8 *Burdette<sup>1</sup>, Martha C. Nason<sup>5</sup>, Irwin M. Feuerstein<sup>1</sup>, Gustavo Palacios<sup>4</sup>, Marisa C. St.*  
9 *Claire<sup>1</sup>, Matthew G. Lackemeyer<sup>1</sup>, Reed F. Johnson<sup>1</sup>, Katarina M. Braun<sup>6</sup>, Mitchell D.*  
10 *Ramuta<sup>7</sup>, Jiro Wada<sup>1</sup>, Connie S. Schmaljohn<sup>1</sup>, Thomas C. Friedrich<sup>6,8\*</sup>, David H.*  
11 *O'Connor<sup>7,8,\*</sup>, and Jens H. Kuhn<sup>1,\*</sup>*

12

13 <sup>1</sup>Integrated Research Facility at Fort Detrick, National Institute of Allergy and Infectious  
14 Diseases, National Institutes of Health, Fort Detrick, Frederick, MD 21702, USA

15 <sup>2</sup>Integrated Research Facility at Fort Detrick, Clinical Monitoring Research Program  
16 Directorate, Frederick National Laboratory for Cancer Research supported by the  
17 National Cancer Institute, Frederick, MD 21702, USA

18 <sup>3</sup>Center for Infectious Disease Imaging, Warren G Magnuson Clinical Center, National  
19 Institutes of Health, Bethesda, MD, 20814, USA

20 <sup>4</sup>United States Army Medical Research Institute of Infectious Diseases, Fort Detrick,  
21 Frederick, Maryland 21702, USA

22 <sup>5</sup>Biostatistics Research Branch, National Institute of Allergy and Infectious Diseases,  
23 National Institutes of Health, Rockville, MD 20892, USA

## SARS-CoV-2 pulmonary abnormalities in macaques

24 <sup>6</sup>Department of Pathobiological Sciences, University of Wisconsin-Madison, Madison,  
25 WI 53706, USA

26 <sup>7</sup>Department of Pathology and Laboratory Medicine, University of Wisconsin-Madison,  
27 Madison, WI 53706, USA

28 <sup>8</sup>Wisconsin National Primate Research Center, Madison, WI 53706, USA

29

30 \*These authors contributed equally to this work

31

32 **Correspondence to:**

33 **Thomas C. Friedrich:** Department of Pathobiological Sciences, University of Wisconsin  
34 School of Veterinary Medicine, AIDS Vaccine Research Laboratory, 555 Science Drive,  
35 Madison, WI 53711 USA; Phone: +1-608-265-3381; Email: [tfriedri@wisc.edu](mailto:tfriedri@wisc.edu)

36 **David H. O'Connor:** Department of Pathology and Laboratory Medicine, University of  
37 Wisconsin-Madison. AIDS Vaccine Research Laboratory, 555 Science Drive, Madison,  
38 WI 53711 USA; Phone: +1-608-890-0845; Email: [dhoconno@wisc.edu](mailto:dhoconno@wisc.edu)

39 **Jens H. Kuhn:** Integrated Research Facility at Fort Detrick (IRF-Frederick), Division of  
40 Clinical Research (DCR), National Institute of Allergy and Infectious Diseases (NIAID),  
41 National Institutes of Health (NIH), B-8200 Research Plaza, Fort Detrick, Frederick, MD  
42 21702, USA; Phone: +1-301-631-7245; Fax: +1-301-631-7389; Email:  
43 [kuhnjens@mail.nih.gov](mailto:kuhnjens@mail.nih.gov)

## SARS-CoV-2 pulmonary abnormalities in macaques

44 **Severe acute respiratory syndrome coronavirus 2 (SARS-CoV-2) is causing an**  
45 **exponentially increasing number of coronavirus disease 19 (COVID-19) cases**  
46 **globally. Prioritization of medical countermeasures for evaluation in randomized**  
47 **clinical trials is critically hindered by the lack of COVID-19 animal models that**  
48 **enable accurate, quantifiable, and reproducible measurement of COVID-19**  
49 **pulmonary disease free from observer bias. We first used serial computed**  
50 **tomography (CT) to demonstrate that bilateral intrabronchial instillation of SARS-**  
51 **CoV-2 into crab-eating macaques (*Macaca fascicularis*) results in mild-to-moderate**  
52 **lung abnormalities qualitatively characteristic of subclinical or mild-to-moderate**  
53 **COVID-19 (e.g., ground-glass opacities with or without reticulation, paving, or**  
54 **alveolar consolidation, peri-bronchial thickening, linear opacities) at typical**  
55 **locations (peripheral>central, posterior and dependent, bilateral, multi-lobar). We**  
56 **then used positron emission tomography (PET) analysis to demonstrate increased**  
57 **FDG uptake in the CT-defined lung abnormalities and regional lymph nodes.**  
58 **PET/CT imaging findings appeared in all macaques as early as 2 days post-**  
59 **exposure, variably progressed, and subsequently resolved by 6–12 days post-**  
60 **exposure. Finally, we applied operator-independent, semi-automatic quantification**  
61 **of the volume and radiodensity of CT abnormalities as a possible primary endpoint**  
62 **for immediate and objective efficacy testing of candidate medical countermeasures.**

63

64 The causative agent of human coronavirus disease 2019 (COVID-19), severe acute  
65 respiratory syndrome coronavirus 2 (SARS-CoV-2), likely emerged in Wūhàn, Húběi  
66 Province, China in November 2019 ([1-3](#)). The virus rapidly spread through the human

## SARS-CoV-2 pulmonary abnormalities in macaques

67 population, causing more than 4.2 million infections and almost 300,000 deaths globally  
68 by May 14, 2020 (4). Infections result in a wide spectrum of disease ranging from  
69 asymptomatic to mild upper respiratory illness to severe pneumonia that can progress to  
70 acute respiratory distress syndrome (ARDS) and death despite aggressive supportive care  
71 (5). After a short but variable incubation period, most patients with COVID-19 develop  
72 self-limiting fever, cough, nonspecific fatigue, and myalgia (6-11). Some patients  
73 develop non-productive cough and dyspnea related to lower respiratory tract  
74 involvement; particularly in patients of older age or with co-morbidities, this involvement  
75 can lead to severe, progressive disease and unfavorable outcomes (5). Well-documented  
76 characteristic lung CT findings in humans include ground-glass opacities (GGOs) with or  
77 without reticulation, reticulonodular opacities, inter- or intralobular septal paving, or  
78 consolidation in a bilateral, lobar to sub-segmental, and peripheral distribution (6-8, 12).  
79 Notably, GGOs have been described in patients who are shedding SARS-CoV-2 but do  
80 not present with clinical signs (13, 14). Bilateral diffuse alveolar damage, type II  
81 pneumocyte hyperplasia, interstitial fibrosis and inflammation, hemorrhage, and edema  
82 with syncytia appear to be typical lung histopathological findings seen in a limited human  
83 data set that also suggests a high rate of venous thromboembolism (15-19).

84 Currently available rodent/carnivore/tree shrew (20-24) and nonhuman primate  
85 (NHP) (11, 25-29) models of SARS-CoV-2 infection do not accurately reflect severe  
86 human COVID-19. NHPs, considered an evolutionary proximate for human disease  
87 modeling, develop no or only mild clinical disease signs (11, 26-29). In SARS-CoV-2-  
88 infected rhesus monkeys (*Macaca mulatta*), quantifiable virus shedding, virus-specific  
89 immune responses, and limited histopathologic lesions have been observed (11, 25, 27-

## SARS-CoV-2 pulmonary abnormalities in macaques

90 [29](#)). However, in both human disease and animal models, the temporal and mechanistic  
91 relationship between viral replication, subsequent immunopathology ([30](#), [31](#)), and clinical  
92 disease remains uncertain. Furthermore, in the available NHP models, all of which are  
93 sublethal, markers of clinical disease (cage-side scoring, chest X-ray) have been of  
94 limited sensitivity. More concerningly, both metrics are subject to observer bias ([32-35](#)).

95       Reliable animal models needed for rapid development and evaluation of candidate  
96 medical countermeasures (MCMs) require an unbiased reproducible and quantifiable  
97 metric of disease that mirrors key aspects of COVID-19. Based on the rather limited X-  
98 ray findings in the lungs of reported NHP models of SARS-CoV-2 infection with either  
99 mild or no clinical signs ([11](#), [25](#), [27-29](#)), we turned to high-resolution chest CT and  
100 PET/CT to characterize lung abnormalities in infected NHPs toward longitudinal  
101 quantitative comparison.

102       We used direct bilateral primary intrabronchial instillation in a 1-day-apart  
103 staggered design to expose two groups of three crab-eating macaques (*Macaca*  
104 *fascicularis*) to medium (mock group macaques M1–3) or medium including  $3.65 \times 10^6$   
105 pfu/macaque of SARS-CoV-2 (virus group macaques V1–3) (**Supplementary Table 1**).  
106 All macaques were observed daily for 11 days prior to exposure (day [D] 0) and for 30  
107 days post-exposure. Physical examination scores and blood, conjunctival,  
108 nasopharyngeal, oropharyngeal, rectal, fecal, and urine specimens were collected at  
109 identical timepoints. Virus-exposed macaques were indistinguishable from mock group  
110 macaques during the pre-exposure time period. Two pre-exposure chest CT and whole-  
111 body 2-deoxy-2- $^{18}\text{F}$ -fluoro-D-glucose (FDG) PET/CTs and eight post-exposure CTs and  
112 three post-exposure PETs were performed at identical timepoints (**Figure 1**). In line with

## SARS-CoV-2 pulmonary abnormalities in macaques

113 previously published results ([11](#), [25-29](#)), none of the macaques developed any major  
114 clinical abnormalities (including by cage-side assessment and clinical scoring or physical  
115 examination) throughout the study and clinical laboratory results were not significantly  
116 different between the mock-exposed and virus-exposed groups (**Supplementary Tables**  
117 **2–3**). SARS-CoV-2 RNA could not be detected by RT-qPCR in any sample from mock-  
118 exposed macaques but was variably present during the early days post-exposure in  
119 conjunctival, fecal, nasopharyngeal, oral, and rectal swabs, but never in plasma or urine  
120 (**Figure 2a**). Anti-SARS-CoV-2 IgG antibodies were not detectable by ELISA in mock-  
121 exposed macaques but were detectable at D10 post-exposure and continued to rise in all  
122 virus-exposed macaques to at least D19 (**Figure 2b**). Consistent with ELISA results,  
123 fluorescent neutralization titers generated from sera were undetected until D10 and were  
124 detected only in virus-exposed macaques (**Figure 2c**). Longitudinal measurement of  
125 selected peripheral cytokines revealed between- and within-group differences with  
126 marked abnormalities noted in macaque V3, which also had the highest IgG antibody  
127 titers (**Supplementary Figure 1**).

128 With the exception of minor and transient abnormalities on baseline imaging, CT  
129 scans of all mock-exposed macaques appeared generally normal over the entire study  
130 period (**Supplementary Figure 2**). However, all virus group macaques developed lung  
131 abnormalities clearly visible by chest CT as early as D2. Qualitatively, the distribution  
132 morphology, and duration of abnormalities described a spectrum similar to mild-  
133 moderately ill humans with COVID-19. Characteristic CT findings in all virus group  
134 macaques included bilateral peripheral GGOs variably in association with intra- or  
135 interlobular septal prominence (so-called “crazy paving”), reticular or reticulonodular

## SARS-CoV-2 pulmonary abnormalities in macaques

136 opacities, peri-bronchial thickening, subpleural nodules, and, in one macaque, dense  
137 alveolar consolidation with air bronchograms (**Figures 3–4a, Videos 1–3,**  
138 **Supplementary Figure 3**). Longitudinal serial CT scans showed heterogeneity in the  
139 duration and evolution of these abnormalities over the next week from rapid  
140 improvement within a few days (macaque V1) to persistence and progression (macaques  
141 V2, V3) (**Figure 4a, Supplementary Figure 3**). Nonetheless, by D19, chest CT  
142 universally showed complete or nearly complete resolution of lung abnormalities in all  
143 virus group macaques. Individual and per-group average radiologist-derived CT scores  
144 (adapted from a scoring system generated from human COVID-19 CT images)  
145 demonstrate the extent and duration of these qualitative findings (**Figure 5**).

146       Increased FDG uptake detected by PET (**Figure 6, Supplementary Figures 4–5**)  
147 corresponded well to the structural changes in the lungs observed by CT, and regional  
148 lymph node uptake was seen in all virus group macaques at D2. In macaque V1, FDG  
149 uptake decreased in the lungs at D6 but increased in mediastinal lymph nodes, and new  
150 FDG uptake was identified in the spleen. The two macaques (V2, V3) with persistent or  
151 progressive structural abnormalities on chest CT had variable changes in FDG uptake  
152 associated with the structural abnormalities in the lungs (some markedly increased, some  
153 improved) with an accompanying marked increase in FDG uptake in regional lymph  
154 nodes and spleens on D6. PET scan on D12 revealed normalization of previous areas of  
155 increased FDG uptake in the lung parenchyma in all three virus-exposed macaques, and  
156 persistent increased FDG uptake in regional lymph nodes and spleen. Mock-exposed  
157 macaques did not have similar increased FDG uptake with the exception of transient  
158 increased uptake in regional lymph nodes after mock-exposure in a single macaque (M1).

## SARS-CoV-2 pulmonary abnormalities in macaques

159 Quantification of the  $SUV_{max}$  in selected regions of interest (ROI) in the lung, specific  
160 regional lymph nodes, and spleen mapped well to the qualitative findings in both mock-  
161 exposed and virus-exposed macaques (**Figure 7**).

162 CT images can be used for quantification of lung abnormalities using measures of  
163 volume or radiodensity, i.e., total lung volume (LV); average radiodensity in the total  
164 lung volume (LD); hyperdense volume (HV), a volume of lung in which radiodensity  
165 (Hounsfield units, HU) is above a pre-defined threshold; and average radiodensity in the  
166 hyperdense volume (hyperdensity, HD). Normalized changes from a pre-exposure  
167 baseline can be longitudinally measured as the percent change in the volume of lung  
168 hyperdensity (PCLH). Toward standardization across lung volumes, PCLH can be also be  
169 expressed as a percent of total lung volume (PCLH/LV). Increases in PCLH or PCLH/LV  
170 were not seen in the mock-exposed macaques over the entire study (**Figure 8a–d**,  
171 **Supplementary Figure 2**). However, post-exposure increases in PCLH or PCLH/LV  
172 were noted in all virus group macaques starting at D2, notably with heterogeneity in both  
173 the peak and duration of PCLH and PCLH/LV that corresponded well to longitudinal  
174 qualitative chest CT observations in individual virus group macaques (**Figure 4b**, **Figure**  
175 **8a–d**, **Supplementary Figure 2**). Though both measures captured similar differences  
176 between groups, the within-group variability was unsurprisingly less with PCLH/LV  
177 versus PCLH. The virus group had significantly higher cumulative PCLH/LV over days  
178 0–30 as summarized by the area under the curve ( $AUC_{0-30}$ ;  $p=0.01$ ). The  $AUC_{0-8}$  for days  
179 0–8 showed a similar trend ( $p=0.06$ ), as did the  $AUC_{0-8}$  and  $AUC_{0-30}$  for the PCLH  
180 ( $p=0.06$  and  $p=0.03$ , respectively).



## SARS-CoV-2 pulmonary abnormalities in macaques

181 A comparison of PCLH or PCLH/LV (**Figure 8a–d**) and absolute radiodensity  
182 (change in HD, change in LD) (**Figure 8e–h**) highlights similarities and differences  
183 windowed by these readouts that are particularly apparent as the CT abnormalities  
184 evolved in macaque V3. In this macaque, dense consolidation in the left lung reached  
185 peak radiodensity at D6, subsequently evolving toward a larger volume of less dense  
186 mixed consolidation and GGO at D8 (**Figure 4a**). This progression of findings is  
187 captured as an increase in PCLH (**Figure 8a**) and PCLH/LV (**Figure 8c**) from D6–8, but  
188 a sharp decline in HD (**Figure 8e**) over the same period.

189 Quantifiable changes in CT lung abnormalities, e.g., AUC of the PCLH/LV curve  
190 in an appropriately powered macaque study, could be used to objectively evaluate  
191 efficacy of candidate MCMs, including vaccines and therapeutics. Although the  
192 described crab-eating macaque model windows only mild to moderate radiographic  
193 disease, it captures heterogeneity in both severity and duration of disease; the readout can  
194 be similarly applied to any larger animal model of increased severity should they become  
195 available in the future. These objective measurements add to semi-quantitative scoring,  
196 which is potentially subject to observer bias in experimental settings ([36-39](#)); in our  
197 study, semi-quantitative findings include radiologist-derived CT lung scores (**Figure 5**)  
198 or mean  $SUV_{max}$  measured in operator-selected regions of interest (ROIs) on PET/CT  
199 scans (**Figure 7**).

200 Of interest, the disease heterogeneity captured by our imaging readouts is  
201 mirrored to some degree in thus-far limited measures of innate or adaptive immunity,  
202 namely in ELISA and neutralizing antibody titers and in longitudinal measurements of  
203 peripheral cytokines. Conclusions cannot be meaningfully drawn from the small numbers

## SARS-CoV-2 pulmonary abnormalities in macaques

204 of measurements taken from only three macaques; nonetheless, between- and within-  
205 group differences in cytokines that have been identified as biomarkers of disease, disease  
206 severity, and disease outcome in humans ([30](#), [40-44](#)) are observed. Most notable in this  
207 regard is a remarkable concentration increase of cytokines associated with cytokine  
208 release syndrome (aka “cytokine storm”), such as C-X-C motif chemokine ligand 8  
209 (CXCL8), interleukin (IL) 6, IL13, IL15, IL1 receptor antagonist (IL1RN), and tumor  
210 necrosis factor (TNF), starting around D6 in the macaque (V3) with the most significant  
211 CT and PET/CT abnormalities.

212 A key advantage of quantifiable CT chest imaging readout over serial euthanasia  
213 studies, in addition to potentially reduced experimental animal numbers, is the ability not  
214 only to evaluate between-group differences, but also to compare severity and duration of  
215 disease at higher resolution in single animals and even in isolated parenchymal areas  
216 sequentially. This approach can reduce the error inherent in cross-sectional sampling of  
217 individual animals at single timepoints. Imaging does, however, introduce its own  
218 experimental complexities and limitations. As we aimed to evaluate whether PCLH (or  
219 other CT imaging readouts presented in **Figure 8**) could be a useful quantitative readout  
220 for radiographic progression in the SARS-CoV-2 infected lung, we chose not to include  
221 irradiated inactivated SARS-CoV-2 in the mock inoculum to avoid antigen-induced  
222 inflammation and related radiographic changes. For similar reasons, and to avoid  
223 artificial dissemination of SARS-CoV-2, we specifically did not perform bronchoalveolar  
224 lavage (BAL) to obtain lung samples for downstream cellular, molecular, and virologic  
225 analysis ([45](#), [46](#)) and did not perform lung biopsies. The frequency of anesthesia and  
226 instrument availability pragmatically limit imaging to carefully chosen timepoints during

## SARS-CoV-2 pulmonary abnormalities in macaques

227 a study. In particular, the extended time required to perform PET imaging resulted in  
228 logistical limitations of the number of macaques that could be included in the study.  
229 Finally, with complete resolution of radiographic abnormalities by the end of the study  
230 period, we opted not to euthanize these macaques to be able to perform a re-exposure  
231 study in the future. Thus, we cannot correlate radiographic with histopathologic findings.

232 Future studies should extend our initial findings in several directions. First,  
233 follow-up confirmation of these pilot results in this model of mild-moderate COVID-19  
234 is needed to further establish quantifiable lung CT as a reliable disease readout and to  
235 forge imaging-pathologic correlates in macaques euthanized at peak radiographic  
236 abnormality. Confirmation should enable proof-of-concept evaluation of whether a  
237 candidate MCM will indeed significantly decrease peak or AUC of PCLH or PCLH/LV  
238 compared to untreated infected control macaques. Data from additional macaques will be  
239 used to confirm the sensitivity and relevance of the  $AUC_{0-8}$  and  $AUC_{0-30}$  for PCLH or  
240 PCLH/LV as robust measures of lung changes from CT evaluation.

241 In parallel, disease severity could possibly be increased in the crab-eating  
242 macaque model by optimizing delivery of SARS-CoV-2 to the most vulnerable lung (via  
243 aerosol or more distal bronchoscopic delivery), with the ultimate goal of using the CT-  
244 quantifiable volume or radiodensity readouts to model the sick hospitalized human.

245 Other groups are already evaluating NHPs of diverse species as possible COVID-  
246 19 models. In these models, serial chest CT imaging after intrabronchial instillation of  
247 SARS-CoV-2 could be used to establish a meaningful and quantifiable COVID-19-like  
248 disease readout that will enable objective evaluation of medical countermeasures and also  
249 a comparison of SARS-CoV-2-induced lung abnormalities in different NHP models.

## SARS-CoV-2 pulmonary abnormalities in macaques

250

### 251 **Methods**

#### 252 **Virus**

253 Severe acute respiratory syndrome coronavirus 2 (SARS-CoV-2; *Nidovirales*:  
254 *Coronaviridae*: *Sarbecovirus*) isolate 2019-nCoV/USA-WA1-A12/2020 was obtained  
255 from the US Centers for Disease Control and Prevention (CDC; Atlanta, GA, USA). A  
256 master virus stock (designated IRF\_0394) was grown under high (biosafety level 3)  
257 containment conditions at the IRF-Frederick by inoculating grivet (*Chlorocebus*  
258 *aethiops*) Vero cells obtained from the American Type Culture Collection (ATCC;  
259 Manassas, VA, USA; #CCL-81) maintained in Dulbecco's Modified Eagle Medium with  
260 L-glutamine (DMEM, Lonza, Walkersville, MD, USA) supplemented with 2% heat-  
261 inactivated fetal bovine serum (FBS; SAFC Biosciences, Lenexa, KS, USA) at 37°C in a  
262 humidified 5% CO<sub>2</sub> atmosphere, harvested after 72 h, and quantified by plaque assay in  
263 Vero E6 cells (ATCC #CRL-1586) using a 2.5% Avicel overlay with a 0.2% crystal  
264 violet stain at 48 h following a previously published protocol (47). The genomic sequence  
265 of the IRF\_394 master stock was determined experimentally by two independent  
266 amplification approaches: nonspecific DNA amplification (sequence-independent single  
267 primer amplification [SISPA]) as described previously (48) and the ARTIC protocol (49),  
268 which was designed to amplify overlapping regions of the SARS-CoV-2 reference  
269 genome (MN908947.3). Primer information and genomic alignment position are  
270 available at [https://github.com/artic-network/artic-](https://github.com/artic-network/artic-ncov2019/tree/master/primer_schemes/nCoV-2019/V1)  
271 [ncov2019/tree/master/primer\\_schemes/nCoV-2019/V1](https://github.com/artic-network/artic-ncov2019/tree/master/primer_schemes/nCoV-2019/V1). PCR products were purified with  
272 the MinElute PCR Purification Kit (QIAGEN, Valencia, CA, USA). Libraries were

## SARS-CoV-2 pulmonary abnormalities in macaques

273 prepared with the SMARTer PrepX DNA Library Kit (Takara Bio, Mountain View, CA,  
274 USA), using the Apollo NGS library prep system (Takara Bio, Mountain View, CA,  
275 USA). Libraries were evaluated for quality using the Agilent 2200 TapeStation System  
276 (Agilent, Santa Clara, CA, USA). After quantification by qPCR with the KAPA SYBR  
277 FAST qPCR Kit (Roche, Pleasanton, CA, USA), libraries were diluted to 2 nM, and  
278 sequenced on a MiSeq (Illumina, San Diego, CA, USA). The genomic sequence of  
279 IRF\_394 was found to be identical to the type sequence of SARS-CoV-2 isolate 2019-  
280 nCoV/USA-WA1-A12/2020 (GenBank MT020880.1), and IRF\_394 was determined to  
281 be devoid of bacterial or viral contaminants.

282

### 283 **Animals**

284 Six crab-eating (aka cynomolgus) macaques (*Macaca fascicularis* Raffles, 1821) of both  
285 sexes, 4–4.5 years old and weighing 3.17–4.62 kg (**Supplementary Table 1**), were  
286 obtained from Cambodia via Envigo Captive (Hayward, CA, USA) and housed at the US  
287 National Institutes of Health Animal Center (NIHAC; Dickerson, MD, USA) for 3  
288 months. All female macaques were on depot medroxyprogesterone acetate (administered  
289 intramuscularly, 150 mg/ml) while at NIHAC for several months. The last dose  
290 administered was administered approximately one month prior to study start. The  
291 macaques were subsequently moved into the maximum (biosafety level 4 [BSL-4])  
292 containment laboratory at the IRF-Frederick, a facility accredited by the Association for  
293 Assessment and Accreditation of Laboratory Animal Care International (AAALAC).  
294 Prior to facility entry, all macaques were serologically screened for herpes B virus,  
295 simian immunodeficiency virus (SIV), simian retrovirus, and simian T-lymphotropic

## SARS-CoV-2 pulmonary abnormalities in macaques

296 virus (STLV) infection; all macaques tested negative. Macaques also tested negative  
297 multiple times for *Mycobacterium tuberculosis* infection. Once in containment, the  
298 macaques passed physical exams and routine bloodwork and were confirmed appropriate  
299 for study assignment by IRF-Frederick veterinarians. Experimental procedures for this  
300 study (protocol “SARS-CoV-2-NHP-064E-1”) were approved by the National Institute of  
301 Allergy and Infectious Diseases (NIAID), Division of Clinical Research (DCR), Animal  
302 Care and Use Committee (ACUC), and were in compliance with the Animal Welfare Act  
303 regulations, Public Health Service policy, and the *Guide for the Care and Use of*  
304 *Laboratory Animals 8<sup>th</sup> Ed.* recommendations. The macaques were singly housed during  
305 the 2-week acclimatization to the maximum containment laboratory and the course of the  
306 study, and were provided with appropriate enrichment including, but not limited to,  
307 polished steel mirrors, durable toys, and food enrichment. Macaques were anesthetized in  
308 accordance with maximum containment standard operating procedures prior to all  
309 macaque manipulations, including virus exposure, sample collection, and medical  
310 imaging. Macaques were observed following anesthesia to ensure complete recovery. All  
311 work with NHPs was performed in accordance with the recommendations of the  
312 Weatherall Report.

313

### 314 **Macaque exposures**

315 The macaques were split into 2 groups of 3 animals each (**Supplementary Table 1**).  
316 Mock group (M) macaques received 2 ml of DMEM + 2% heat-inactivated FBS into each  
317 bronchus by direct bilateral primary post-carinal intrabronchial instillation, followed by a  
318 1-ml normal saline flush and then 5 ml air. Virus group (V) macaques were exposed the

## SARS-CoV-2 pulmonary abnormalities in macaques

319 same way with each 2-ml instillate containing  $9.13 \times 10^5$  pfu/ml (i.e., a total exposure dose  
320 of  $3.65 \times 10^6$  pfu) of SARS-CoV-2 followed by 1-ml saline flush and then 5 ml air. All  
321 macaques were sedated prior to instillation. Prior to administering anesthesia,  
322 glycopyrrolate (0.06 mg/kg) was delivered intramuscularly to reduce saliva secretions.  
323 Next, each macaque received 10 mg/kg ketamine and then 35  $\mu$ g/kg dexmedetomidine  
324 intramuscularly. To reverse anesthesia, 0.15 mg/kg atipamezole was administered  
325 intravenously. All macaques were evaluated daily for health and were periodically  
326 examined physically, including blood draws, and conjunctival (left and right),  
327 nasopharyngeal, oropharyngeal, and rectal swab collection. Stool and urine were also  
328 collected on each day swabs were collected. All swabs were collected in 1-ml universal  
329 virus transport (UVT) media (BD Biosciences, San Jose, CA, USA).

330

### 331 **Macaque scoring**

332 Cage-side assessment scoring criteria (**Supplementary Table 4**) were modified from  
333 Chertow *et al.* (2016) to include clinical signs relevant to COVID-19 and respiratory rates  
334 of crab-eating macaques (9, 50, 51). In addition to cage-side observations, physical exam  
335 scoring criteria were implemented to assess clinical conditions on days when macaques  
336 were anesthetized (**Supplementary Table 4**). Cage-side and physical exam scoring  
337 criteria were developed in collaboration with National Primate Research Centers  
338 (NPRCs) to standardize disease assessment and compare disease outcomes between NHP  
339 models. Heart rate was not incorporated into the physical exam scores until D2 because  
340 heart rate score was determined as beats per minute over baseline. Baseline heart rate was  
341 determined as an average over three timepoints, D-11, D-5/D-6, and D0 (except for

## SARS-CoV-2 pulmonary abnormalities in macaques

342 macaque V3, for which heart rate was not recorded prior to dexmedetomidine

343 administration).

344

### 345 **Clinical analysis**

346 Blood samples were collected in Greiner Bio-One Hematology K<sub>3</sub>EDTA Evacuated

347 Tubes (Thermo Fisher Scientific). Complete blood counts, including leukocyte

348 differentials and reticulocyte counts (CBC/Diff/Retic), were determined using the Procyte

349 DX (IDEXX Laboratories, Westbrook, ME, USA). The Catalyst One analyzer (IDEXX

350 Laboratories) was used for biochemical analyses of serum samples, which were collected

351 in Greiner Bio-One VACUETTE Z Serum Sep Clot Activator Tubes (Thermo Fisher

352 Scientific). Samples were run on both machines the day of collection shortly following

353 collection such that they were not stored prior to analysis. On D30, an equipment issue

354 with the Procyte DX required that samples from the virus-exposed group be stored at 4°C

355 for about 30 h prior to analysis. For a list of all measured parameters and their values, see

356 **Supplementary Table 3.**

357

### 358 **Image acquisition**

359 Following sample collection and intubation, macaques were moved to chest computed

360 tomography (CT) or whole-body positron emission tomography combined with CT

361 (PET/CT) imaging. For imaging procedures, each macaque was anesthetized

362 intramuscularly with 15 mg/kg ketamine following 0.06 mg/kg glycopyrrolate

363 intramuscularly. Anesthesia was maintained using a constant rate intravenous infusion of

364 propofol at 0.3 mg/kg/min (except on D-11 when propofol at 0.2 mg/kg/min was used).



## SARS-CoV-2 pulmonary abnormalities in macaques

365 Macaques were placed on the scanner's bed in a supine, head-out/feet-in position and  
366 connected to a ventilator to facilitate breath holds, and vital signs were monitored  
367 throughout the imaging process.

### 368 *High resolution chest CT*

369 Chest CT scans were performed using the 16-slice CT component of a Gemini TF 16  
370 PET/CT (Philips Healthcare, Cleveland, OH, USA) or a Precedence SPECT/CT scanner  
371 (Philips Healthcare). Chest CT images were acquired in helical scan mode with the  
372 following parameter settings: ultra-high resolution, 140 kVp, 300 mAs/slice, 1 mm  
373 thickness, 0.5 mm increment, 0.688 mm pitch, collimation 16x0.75, and 0.75 s rotation.  
374 CT image reconstruction used a 512x512 matrix size for a 250-mm transverse field-of-  
375 view (FOV), leading to a pixel size of 0.488 mm. Two CT images were produced: one  
376 with the standard "B" filter and one with the bone-enhanced "D" filter. No contrast agent  
377 was administered. Each macaque underwent a 15–20-s breath-hold during acquisition.  
378 The pressure for the breath-hold was maintained at 150 mmH<sub>2</sub>O.

### 379 *Whole-body PET/CT*

380 Whole-body PET/CT scans were performed using a Gemini TF 16 TF PET/CT scanner.  
381 Radiotracer (2-deoxy-2-[<sup>18</sup>F]-fluoro-D-glucose; FDG) was injected intravenously (0.5  
382 mCi/kg FDG, up to 4.0 mCi/scan) and the time of injection was recorded. After high-  
383 resolution chest CT imaging with breath-hold session (≈5 min), whole-body CT images  
384 were acquired (≈5 min) in helical scan mode with the following parameter settings: high  
385 resolution, 140 kVp, 250 mAs/slice, 3 mm thickness, 1.5 mm increment, 0.688 mm pitch,  
386 collimation 16x0.75, and 0.5 s rotation. Two CT images were reconstructed from the raw  
387 data. An initial CT image was reconstructed into a 600-mm diameter field-of-view

## SARS-CoV-2 pulmonary abnormalities in macaques

388 (FOV), resulting in a pixel size of 1.17 mm and a slice spacing of 1.5 mm. This CT image  
389 was used to create an attenuation map needed to correct the PET images for photon  
390 attenuation. Raw CT data were reconstructed a second time into diagnostic quality CT  
391 images by reducing the FOV size to 250 mm, resulting in a pixel size of 0.488 mm with 1  
392 mm slice thickness. One CT image was produced with the standard (“B”) filter. No  
393 contrast agent was administered, and the macaques breathed freely during the scan.  
394 Following whole-body CT scanning, whole-body PET scans covering the macaques’  
395 bodies from the top of the head to the middle of the thighs was performed after a 60-min  
396 delay. Depending on the size of the NHP, 6 or 7 bed positions (with 50% overlap) were  
397 needed for this scan range. Dwell time per bed position was 3 min, resulting in a total  
398 duration of 18 or 21 min/scan. PET data were reconstructed into a set of either 300- or  
399 342-image slices with 128x128 2-mm-cubic voxels. To ensure quantitative accuracy, all  
400 reconstructed PET images were corrected during scans for radioactive decay, uniformity,  
401 random coincidences, and attenuation and scattering of PET radiation *in situ*. Lastly,  
402 whole-body CT imaging with iopamidol (600 mg iodine/kg) intravenous contrast material  
403 were acquired at D-11 and the terminal D30 scans. Each macaque underwent a 30–50-s  
404 breath-hold during acquisition. The pressure for the breath-hold was maintained as 150  
405 mmH<sub>2</sub>O. After completion of imaging, macaques were returned to the clinical team for  
406 subsequent procedures.

407

### 408 **Image evaluation**

#### 409 *Chest CT evaluation*

## SARS-CoV-2 pulmonary abnormalities in macaques

410 An adapted semi-quantitative scoring system based on a previously published method  
411 ([52](#)) was used to quantitatively estimate the pulmonary involvement of lung  
412 abnormalities on the extent of parenchymal lung disease in each lung lobe. The sums of  
413 the lobar scores were used to generate total lung summary scores. CT scores ranged from  
414 0–5 for each lobe (right upper, right middle, right lower, right accessory, left upper, left  
415 middle, and left lower). Lobes were scored as: 0 = no disease involvement, 1 ≤5%, 2 = 5–  
416 24%, 3 = 25–49%, 4 = 50–74%, 5 ≥75%, with a maximum total lung score of 35. Score  
417 increments of 0.5 were used to indicate improvement (or worsening) in radiodensity  
418 when changes in volume were insufficient to change score category. Additional data  
419 points included cohort (macaques M1–3 and V1–3), scan date and study day, and number  
420 of “lesions”. Types of infiltrates (GGOs, paving, consolidation, and organizing  
421 pneumonia) per lobe were given individual 0–5 scores, and the overall predominant type  
422 of infiltrate per each lobe and each subject scan were recorded. The summary scores per  
423 each lobe and whole lung were used as markers of disease progression. Image analysis  
424 was performed by a board-certified radiologist and a research fellow using MIM software  
425 version 6.9 (Cleveland, OH, USA).

426 To quantify CT data, the lung field was segmented using a region-growing  
427 implementation (MIM software). Entire lung volumes (LV) were measured at each time  
428 point (n: at time point n; b: at baseline). A histogram analysis was performed on the voxel  
429 intensities (radiodensity in Hounsfield units [HU]) within the segmented lung. Percent  
430 change in the volume of hyperdense lung tissue was determined as described previously  
431 ([53](#)). Briefly a threshold value was determined for each subject, based on a 5% cutoff in  
432 the upper tail of the histogram of lung tissue from the baseline CT scan. Due to an

## SARS-CoV-2 pulmonary abnormalities in macaques

433 inability to keep the lungs of the virus group macaques inflated to approximately the  
434 same volumes over time, a correction was applied to the 5% PCLH threshold as  
435 previously described ([54](#)).

436 As more abnormalities (e.g., GGOs, consolidation) appear during the disease  
437 process, a larger volume of tissue will have higher HU values and PCLH as percent  
438 change in lung hyperdense volume (HV) from baseline can be expressed as  $[(HV_n -$   
439  $HV_b)/HV_b]*100$ . Then PCLH/LV can be expressed as  $[V_n/LV_n]*100$ . Change in average  
440 lung radiodensity (LD) in the entire lung volume can be  $[LD_n - LD_b]$ . Change in average  
441 hyperdensity in hyperdense volume can be expressed as  $[HD_n - HD_b]$ . Then, PCLH as  
442 percent change in lung hyperdense volume, PCLH as percent of lung volume  
443 (PCLH/LV), change in the average radiodensity in the entire lung and change in the  
444 averaged hyperdensity in the hyperdense volume were graphed with disease progress. To  
445 visualize CT abnormalities in three dimensions (3D), a volume rendering technique was  
446 used to create videos. In brief, the lungs and airways were extracted from chest CT  
447 images using MIM software. A region growing algorithm was used to segment different  
448 classes including normal lung tissue, vessels, airways, and “lesions” with multiple seeds  
449 at specific locations to achieve realistic segmentations. 3D volume renderings of the  
450 segmentations were generated and animated rotations exhibiting the location and extent  
451 of the abnormalities were produced using 3D Slicer 4 software version 4.10.2 ([55](#)).

452

### 453 *Whole-body PET/CT evaluation*

454 Analysis of imaging data was performed using MIM software. Whole-body CT and PET  
455 scans for a given scanning session were co-registered. Regions of interest (ROIs) were

## SARS-CoV-2 pulmonary abnormalities in macaques

456 placed manually on the PET scans, and location determined on the co-registered CT  
457 scans. These regions included specific lung abnormalities when present, left and right  
458 lung when no specific abnormalities were present, mediastinal and hilar lymph nodes,  
459 and spleen. Once ROIs were placed, mean FDG maximum standardized uptake values  
460 ( $SUV_{max}$ ) were measured from corrected PET images and averaged  $SUV_{max}$  values were  
461 graphed longitudinally.

462 The quantitative analysis was correlated with a qualitative evaluation of CT and  
463 PET/CT lung pathology over time, performed by a board-certified radiologist.

464

### 465 **RT-qPCR**

466 RT-qPCR analysis was performed to determine presence of SARS-CoV-2 RNAs in  
467 collected specimens. Samples were frozen at  $-80^{\circ}\text{C}$  in TRIzol LS (Thermo Fisher  
468 Scientific, Wilmington, DE, USA) and thawed on ice. 100  $\mu\text{l}$  of sample were added to  
469 5PRIME Phase Lock tubes (Quantabio, Beverly, MA, USA) followed by addition of 20  
470  $\mu\text{l}$  of chloroform/tube (Sigma-Aldrich, St. Louis, MO, USA) and inversion by hand 10  
471 times. Phase Lock tubes with sample and chloroform were centrifuged at  $10,000 \times g$  for 1  
472 min at  $4^{\circ}\text{C}$ . Following centrifugation, aqueous phases were removed ( $\approx 55 \mu\text{l}/\text{tube}$ ) and  
473 deposited into clean 1.5-ml Eppendorf tubes. 70% ethanol was subsequently added to  
474 each tube at a 1:1 ratio (55  $\mu\text{l}$  ethanol), inverted 10 times by hand, and briefly  
475 centrifuged. The ethanol/aqueous solution containing extracted RNA was used as input  
476 for purification and isolation using the PureLink RNA Mini Kit (Thermo Fisher  
477 Scientific) following the manufacturer's instructions. RNA was eluted in 30  $\mu\text{l}$  of water.  
478 RT-qPCR was performed using the SuperScript III Platinum One-Step qRT-PCR Kit

## SARS-CoV-2 pulmonary abnormalities in macaques

479 (Thermo Fisher Scientific) following the manufacturer's instructions with the following  
480 changes: reagent volumes were halved, resulting in 25- $\mu$ l final reaction volumes. The N1  
481 assay supplied with the 2019-nCoV CDC qPCR Probe Assay (Integrated DNA  
482 Technologies [IDT], Coralville, IA, USA) was used (1  $\mu$ l/reaction) in lieu of individual  
483 primers and probes. 2  $\mu$ l of extracted RNA or 2019-nCoV\_N\_Positive\_Control (IDT)  
484 were used in each reaction. Samples and controls were run in technical triplicates on a  
485 CFX96 Touch Real-Time PCR Detection System (Biorad, Hercules, CA, USA) following  
486 the manufacturer's recommendations; a 50°C, 15-min reverse-transcriptase step was used  
487 for first strand cDNA synthesis followed by 95°C, 2-min to inactivate the reverse  
488 transcriptase, followed by 45 cycles of 95°C, 15 s, 60°C, 30 s.

489

### 490 **Serology**

491 Serum samples were collected in Greiner Bio-One VACUETTE Z Serum Sep Clot  
492 Activator Tubes and frozen at -80°C. Before removal from the maximum containment  
493 laboratory, virus in samples was inactivated using a cobalt irradiation source with a target  
494 dose of 50 kGy (JLS 484R-2 Cobalt-60 [<sup>60</sup>Co] Irradiator, JLShephard & Associates)  
495 following standard inactivation protocols. Serum samples were subsequently heat-  
496 inactivated at 56°C for 30 min prior to antibody screening. To determine IgG titers,  
497 Immulon 2HB 96-well plates (Thermo Fisher Scientific) were coated with recombinantly  
498 expressed SARS-CoV-2 spike S1 subunit (Sino Biological, Wayne, PA, USA) at 0.1  
499  $\mu$ g/well in 50  $\mu$ l/well overnight at 4°C. Plates were washed three times with phosphate-  
500 buffered saline (PBS) + 0.1% Tween20 (PBS\_T; Sigma-Aldrich) and blocked with  
501 ELISA diluent (5% nonfat milk [LabScientific, Danvers, MA, USA] in PBS-T) for 1 h at

## SARS-CoV-2 pulmonary abnormalities in macaques

502 37°C. Serum samples were serially diluted 1:2 in a dilution block (1:50 to 1:6,400) with  
503 ELISA diluent. After blocking, plates were washed three times with PBS-T and 100  
504 µl/well of diluted sample were transferred to the plate. Samples were incubated for 1 h at  
505 37°C. Plates were then washed three times with PBS-T, and 100 µl of goat anti-human  
506 IgG Fc specific (Jackson ImmunoResearch, West Grove, PA, USA) secondary antibody  
507 conjugated to horseradish peroxidase (HRP; diluted 1:20,000 in ELISA diluent) were  
508 added to each well. Samples were incubated for 1 h at 37°C and finally washed five times  
509 with PBS-T. Plates were developed by adding 100 µl of TMB substrate (Thermo Fisher  
510 Scientific) at room temperature for 10 min in the dark. Development was stopped by the  
511 addition of 100 µl of Stop Solution (Thermo Fisher Scientific). Plates were read at 450  
512 nm with a correction wavelength of 650 nm using a Spectramax Plus 384 (Molecular  
513 Devices, San Jose, CA, USA) within 30 min of stopping the reaction. Reciprocal  
514 endpoint titers were determined in GraphPad software version 8.4.2 (Prism, La Jolla, CA,  
515 USA), using a sigmoidal 4 parameter-logistic fit curve. Endpoint titers were calculated at  
516 the point when the curve crossed the ELISA cutoff value. For the S1 subunit IgG ELISA,  
517 the cutoff value was determined to be an optical density (OD) of 0.19077, which was  
518 determined from control sera collected from twenty-five NHPs sampled prior to the  
519 known emergence of SARS-CoV-2. Data are presented as the mean and standard  
520 deviation of two independent ELISA runs.

521

### 522 **Fluorescence neutralization assay**

523 All assays were run with irradiated and heat-inactivated sera. Irradiation and heat-  
524 inactivation were performed as described above. Vero E6 cells were seeded at  $3 \times 10^4$  in

## SARS-CoV-2 pulmonary abnormalities in macaques

525 100  $\mu$ l DMEM+10% heat-inactivated FBS in 96-well Operetta plates (Greiner Bio-One,  
526 Monroe, NC, USA). The following day, a series of six-point dilutions, each 1:2, were  
527 performed in duplicate starting with a dilution of 1:20 (1:20, 1:40, 1:60, etc.) in 96-well  
528 1.2-ml cluster tubes (Corning Inc, Corning, NY, USA). Then, stock SARS-CoV-2 virus  
529 was diluted in serum free media and was added to the sera in each cluster tube at a  
530 multiplicity of infection (MOI) of 0.5 using a liquidator, doubling the total volume in  
531 each well and further diluting sera 1:2. Thus, the final starting dilution was 1:40. The  
532 sera/virus mixtures were then mixed by pipetting up and down with the liquidator.  
533 Cluster tubes were next incubated for 1 h at 37°C/5% CO<sub>2</sub>. Following incubation, 100  
534  $\mu$ l/well of each virus/serum mixture were transferred to the Operetta plates from the  
535 cluster tubes to yield final volumes of 200  $\mu$ /well (100  $\mu$ l cell seeding media plus 100  $\mu$ l  
536 virus/serum mixture). Each set of cluster tubes provided enough material for each sample  
537 to be run in duplicate in 2 plates, yielding a total of 4 replicates per sample. The  
538 virus/serum mixtures were incubated on plates for 24 h at 37°C/5% CO<sub>2</sub>. Subsequently,  
539 plates were fixed with 20% neutral buffered formalin (Thermo Fisher Scientific) for 24 h  
540 at 4°C. Next, plates were washed with PBS (Thermo Fisher Scientific) and then blocked  
541 with 3% bovine serum albumin (BSA) in 1X PBS for 30 min on a rocker. Staining  
542 followed, first with the primary antibody and then the secondary antibody. The primary  
543 antibody was SARS-CoV-2 Nucleoprotein/NP Antibody, Rabbit mAb (Sino Biological,  
544 Chesterbrook, PA, USA) prepared at 1:8,000 in blocking buffer at room temperature.  
545 Plates were incubated with primary antibody for 60 min on a rocker. The secondary  
546 antibody was goat  $\alpha$ -rabbit IgG (H+L), Alexa Fluor 594 Conjugate (Thermo Fisher  
547 Scientific) prepared at 1:2,500 in 1X PBS. Plates were incubated with secondary antibody



## SARS-CoV-2 pulmonary abnormalities in macaques

548 at room temperature for 30 min on a rocker and in the dark. Between the blocking,  
549 primary, and secondary steps, plates were washed three times with 1X PBS. Finally,  
550 plates were read on a Operetta High-Content Analysis System (PerkinElmer, Waltham,  
551 MA, USA) with at least 4 fields of view of >1,000 cells each. Data were analyzed using  
552 Harmony software (PerkinElmer). Half-maximal neutralization titers (NT<sub>50</sub>) were  
553 calculated by averaging the fluorescence intensity in virus control wells and dividing by  
554 two. The fluorescence intensity of a sample at each dilution was compared to the NT<sub>50</sub>  
555 values, and the lowest dilution that is equal to or less than the NT<sub>50</sub> value was recorded.

556

### 557 **Cytokine analysis**

558 The MILLIPLEX MAP Non-Human Primate Cytokine Magnetic Bead Panel - Premixed  
559 23 Plex – Immunology Multiplex Assay (Millipore, Burlington, MA, USA; #PCYTMG-  
560 40K-PX23) was performed on collected plasma samples following the manufacturer's  
561 instructions. All reagents were warmed to room temperature prior to addition to assay  
562 wells. Quality controls and standards were reconstituted with 250 µl of deionized water  
563 and allowed to sit for 10 min prior to use. A four-fold seven-point standard curve was  
564 generated by diluting the concentrated stock with assay buffer for each point. Assay  
565 buffer alone served as the blank. The plate was first washed with 200 µl of assay buffer  
566 and incubated on an orbital shaker at 800 rpm at room temperature for 10 min. Assay  
567 buffer was decanted, and plates were inverted on absorbent paper to remove any excess  
568 buffer. 25 µl of serum matrix were added to background, control, and standard wells. 25  
569 µl of assay buffer was added to sample wells. 25 µl of samples/standards/controls were  
570 added to the appropriate wells. Beads were resuspended by vortexing and 25 µl were of

## SARS-CoV-2 pulmonary abnormalities in macaques

571 vortexed beads were added to each well. Each plate was sealed and incubated overnight  
572 at 4°C on an orbital shaker at 500 rpm. The next day, plates were washed twice using a  
573 hand-held magnetic plate holder with 200 µl of wash buffer per well and decanted as  
574 previously described. Plates were then incubated on an orbital shaker at 500 rpm at room  
575 temperature for 1 h with 25 µl of detection antibody. After incubation, 25 µl of kit-  
576 provided streptavidin-phycoerythrin were added directly to each well and incubated at  
577 room temperature on an orbital shaker at 500 rpm for 30 min. Plates were washed twice  
578 and 150 µl of sheath fluid was added to each well. Plates were read on a Flexmap 3D  
579 reader (Luminex, Chicago, IL, USA) within 24 h of completion following assay  
580 instructions. The data was exported to Bio-Results Generator version 3.0 and Bio-Plex  
581 Manager software version 6.2 (BioRad). Results were graphed using GraphPad software  
582 version 8.4.2.

583

### 584 **Statistical Analysis**

585 Area under the curve (AUC) summaries were calculated using the trapezoidal rule, and  
586 compared using Welch's t-tests, using R version 3.6.3.

587

### 588 **Data Availability**

589 Data from this study were made available publicly as soon as they became available at  
590 <https://openresearch.labkey.com/project/Coven/COVID-001/begin.view> to inform the  
591 ongoing COVID-19 outbreak response without delay following practices we initiated for  
592 NHP studies of Zika virus pathogenesis in 2016 (56).

593

## SARS-CoV-2 pulmonary abnormalities in macaques

### 594 **Acknowledgements**

595 We thank all the staff of the NIH/NIAID/DCR/Integrated Research Facility at Fort  
596 Detrick who supported this study, in particular Karlton Churchwell, David Drawbaugh,  
597 Kyra Hadley, Zachary Hubble, Nicolette Schuko, and Colin Waters (Clinical Core), Kurt  
598 Cooper and Dan Ragland (Comparative Medicine), Sean Bartlinski (Data Management),  
599 Elena N. Postnikova, Robin Gross, Shuiqing Yu, Lindsay Marron, Steve Mazur, Saurabh  
600 Dixit, Heema Sharma, and Huanying Zhou (Antibody Screening), Jurgen Seidel  
601 (Imaging), Rebecca Bernbaum, Blake Davis, and Erika Maynor (Immunology), Louis  
602 Huzella (Pathology), as well as Yu Cong and Travis K. Warren. We are grateful to  
603 Chelsea Crooks, Amelia K. Haj, Anna S. Heffron, Joseph Lalli, Trent M. Prall, and all  
604 other members of the Coven Consortium at University of Wisconsin for critical input into  
605 study design, study planning and support, and real-time data posting support. We also  
606 would like to thank Daniel S. Chertow (NIH/NIAID/DCR/Clinical Center) for crucial  
607 guidance on intrabronchial instillation, and Nathan W. Finch for his insight particularly  
608 with respect to our radiological findings and analyses.

609 This work was supported in part through Laulima Government Solutions, LLC  
610 prime contract with the US National Institute of Allergy and Infectious Diseases (NIAID)  
611 under Contract No. HHSN272201800013C (R.B., T.K.C., J.L., K.S., G.K., P.S., C.B.,  
612 R.A., J.R.K., T.B., M.G.L., J.W.). C.L.F., J.H.L., and J.H.K. performed this work as  
613 employees of Tunnell Government Services (TGS), a subcontractor of Laulima  
614 Government Solutions, LLC under Contract No. HHSN272201800013C. This work was  
615 also supported in part with federal funds from the National Cancer Institute (NCI),  
616 National Institutes of Health (NIH), under Contract No. HHSN261200800001E to I.C.

## SARS-CoV-2 pulmonary abnormalities in macaques

617 and J.S., who were supported by the Clinical Monitoring Research Program Directorate,  
618 Frederick National Lab for Cancer Research, sponsored by NCI. The views and  
619 conclusions contained in this document are those of the authors and should not be  
620 interpreted as necessarily representing the official policies, either expressed or implied, of  
621 the US Department of Health and Human Services or of the institutions and companies  
622 affiliated with the authors. The study protocol was reviewed and approved by the  
623 NIH/NIAID/DCR/Integrated Research Facility at Fort Detrick, Frederick, MD, USA  
624 Animal Care and Use Committee in compliance with all applicable federal regulations  
625 governing the protection of animals and research.

626

627 **Author contributions.** C.L.F., I.C., J.H.L., T.K.C., J.R.K., M.C.St.C., M.G.L., R.F.J.,  
628 K.M.B., M.R., C.S., T.C.F., D.H.O’C., and J.H.K. contributed to the study conception  
629 and design. C.L.F., J.H.L., R.B., T.K.C., J.L., K.S., P.J.S., G.K., C.B., P.A.L., R.A., B.B.,  
630 N.D.P., J.R.K., T.B., M.C.St.C. contributed to study performance, and sample and data  
631 collection. C.L.F., I.C., J.H.L., R.B., T.K.C., J.L., J.S., P.S., C.B., N.A., M.C., T.C.F.,  
632 P.A.L., B.B., N.D.P., J.R.K., J.R.K., M.C.M., I.M.F., G.P., J.W., T.C.F, D.H.O’C., and  
633 J.H.K. contributed to data analyses, interpretation, and writing. All authors read and  
634 approved the final manuscript.

635

636 **Competing interest declaration.** The authors declare no competing interests.

637

638 **Figure Legends**

## SARS-CoV-2 pulmonary abnormalities in macaques

639 **Figure 1 | Study overview.** Three crab-eating macaques (*Macaca fascicularis*) were  
640 exposed to  $\approx 3.65 \times 10^6$  pfu SARS-CoV-2 each by direct bilateral primary post-carinal  
641 intrabronchial instillation and sampled as outlined. A second group of three crab-eating  
642 macaques was mock-exposed and sampled in the same manner one day prior to the virus-  
643 exposed group (exception: a second baseline CT image was recorded for each group on a  
644 single day, D-6 or D-5 (\*)).

645

646 **Figure 2 | Detection of SARS-CoV-2 RNA and specific immune responses in SARS-**  
647 **CoV-2-inoculated and mock-inoculated macaques. a)** RT-qPCR targeting the SARS-  
648 CoV-2 N protein was performed from baseline through D10 in nasopharyngeal swabs for  
649 macaques of both groups. **b)** Anti-SARS-CoV-2 S1 subunit IgG ELISA results are  
650 expressed as reciprocal endpoint titers over time for both mock group (M) and virus  
651 group (V) macaques. **c)** Fluorescence neutralization assays were performed on sera from  
652 all macaques on all days. NT<sub>50</sub>, half-maximal neutralization titer.

653

654 **Figure 3 | COVID-19-like CT abnormalities in the lungs of SARS-CoV-2 inoculated**  
655 **macaques V1 (a–b), V2 (c–g), and V3 (h–j).** Distribution of CT scan abnormalities in  
656 3D images of SARS-CoV-2-inoculated macaque V1 (**a**), V2 (**c**), and V3 (**h**). Blue:  
657 airways; gray: normal lung; red: vessels; yellow: imaging abnormalities. **b)** Selected  
658 characteristic abnormalities in macaque V1 include peripheral, peri-bronchial ground-  
659 glass opacity (GGO) in the left middle lobe (green inset, top, red arrow) and peripheral  
660 GGO with reticulation in the posterior right lower lobe (green inset, bottom, yellow  
661 arrow). **d–g)** Selected characteristic abnormalities in macaque V2 include **d)** peri-

## SARS-CoV-2 pulmonary abnormalities in macaques

662 bronchial consolidation in the left accessory lobe (blue inset, top, red arrow) and  
663 posterior GGO with reticulation in the posterior right lung (blue inset, bottom, red arrow),  
664 **e**) bilateral posterior GGO with reticulation (blue inset, top and bottom, red arrows), **f**)  
665 GGO with superimposed paving (interlobular septal thickening) in right posterior lung  
666 (blue inset, top) and mixed GGO with pleural-based consolidation in left posterior lung  
667 (blue inset, bottom), and **g**) pleural-based mixed GGO and consolidation developing on  
668 D6 (blue inset, blue arrow). **i–j**) Selected characteristic abnormalities in macaque V3  
669 include **i**) GGO with air bronchogram in right posterior lung (orange inset, top, purple  
670 arrow), alveolar consolidation with peripheral GGO and air bronchogram in left posterior  
671 lung (orange inset, bottom, blue arrow), and **j**) expanding and more dense alveolar  
672 consolidation with air bronchogram on D4 (orange inset, blue arrow). Representative 3D-  
673 rendered videos of **a**), **c**), and **h**) demonstrating whole-lung pathology are shown in  
674 **Videos 1–3**, respectively.

675

676 **Figure 4 | Qualitative and quantitative computed tomography (CT) analysis of**  
677 **macaque lungs. a)** Representative axial CT images in three SARS-CoV-2-infected (V)  
678 macaques for each indicated study day (D). The grey scale represents radiodensity in  
679 Hounsfield units (HU). **b)** Percent change in volume of lung hyperdensity (PCLH)  
680 measured over time in the same SARS-CoV-2 inoculated macaques shown in a).  
681 Representative axial CT images and PCLH for all study days in both groups, including  
682 data for mock group (M) macaques, are shown in **Supplementary Figure 2**. In SARS-  
683 CoV-2-inoculated macaques only, selected representative CT images (axial, sagittal, and

## SARS-CoV-2 pulmonary abnormalities in macaques

684 coronal views) with detailed radiological descriptions from pre-inoculation baseline to  
685 day 19) are shown in **Supplementary Figure 3**.

686

687 **Figure 5 | Radiologist-derived CT lung scores of macaque lungs.** Averaged  
688 radiologist-derived CT scores of the entire lungs for individual macaques (**a**) and  
689 averaged for mock group (M) and virus group (V) macaques (**b**) over time.

690

691 **Figure 6 | Qualitative positron emission tomography (PET) and FDG uptake**  
692 **analysis in macaque lung and regional lymph nodes.** Representative coronal 2-deoxy-  
693 2-[<sup>18</sup>F]-fluoro-D-glucose (FDG) PET/CT images for each indicated study day (D) from  
694 pre-inoculation baseline to 12 days after inoculation.  $SUV_{max}$ , maximum standardized  
695 FDG uptake value. Selected areas of increased FDG uptake are indicated in lung  
696 parenchyma (yellow arrows, blue arrows) and regional lymph nodes (pink arrows). All  
697 study days and data for mock group (M) macaques are shown in **Supplementary Figure**  
698 **4**. Selected PET/CT images (axial, sagittal, and coronal views) including detailed  
699 radiological descriptions are shown in **Supplementary Figure 5**.

700

701 **Figure 7 | Quantitation of 2-deoxy-2-[<sup>18</sup>F]-fluoro-D-glucose (FDG) uptake in lung, lymph**  
702 **nodes, and spleen. a)**  $SUV_{max}$  (mean FDG maximum standardized uptake values) for 3–5  
703 selected lung regions of interest (ROIs) with high FDG uptake with tracking of identical  
704 regions of interests at all PET/CT timepoints in each macaque and **b)** averaged for mock  
705 group (M) and virus group (V) macaques. **c)**  $SUV_{max}$  for 2–3 selected lymph node ROIs  
706 with high FDG uptake in each macaque and **d)** averaged for (M) and (V) group

## SARS-CoV-2 pulmonary abnormalities in macaques

707 macaques. **e**)  $SUV_{max}$  for spleen FDG uptake in each macaque and **f**) averaged for (M)  
708 and (V) group macaques.

709

710 **Figure 8 | Quantitative analyses of volume and radiodensity of macaque lungs. a–b)**

711 Percent change in volume of lung hyperdensity (PCLH) measured over time for

712 individual macaques (**a**) as in **Figure 4b** and averaged for mock group (M) and virus

713 group (V) macaques (**b**). **c–d**) PCLH standardized as percent of entire overall lung

714 volumes over time (PCLH/LV) for individual macaques (**c**) and averaged for M and V

715 macaques (**d**). **e–f**) Change in the average lung densities (Hounsfield units [HU]) in the

716 entire lung volumes over time for individual macaques (**e**) and averaged for M and V

717 macaques (**f**). **g–h**) Change in average lung hyperdensities (HU) in the lung hyperdense

718 volume over time for individual macaques (**g**) and averaged for M and V macaques (**h**).

719

720 **Videos 1–3 | Qualitative computed tomography (CT) analysis of macaque lungs. 3D**

721 rendering of the lungs of macaque V1 at D2 (**Video 1**), V2 at D4 (**Video 2**), and V3 at D4

722 (**Video 3**) after SARS-CoV-2 exposure. Blue: airways; gray: normal lung; red: vessels;

723 yellow: imaging abnormalities.



## SARS-CoV-2 pulmonary abnormalities in macaques

### 724 **Supplementary Data**

725 **Supplementary Figure 1 | Cytokines.** Cytokien concentration changes measured for  
726 individual macaques and averaged for mock group (M) and virus group (V) macaques.  
727 Data are represented on logarithmic scales. For graphic representation, values of “0” or  
728 “not detected” (below the level of assay sensitivity) were automatically assigned a value  
729 = 1.

730

731 **Supplementary Figure 2 | Qualitative and quantitative computed tomography (CT)**  
732 **analysis of macaque lungs. a)** Representative axial CT images in three SARS-CoV-2-  
733 infected (V) macaques and mock-inoculated (M) macaques for all indicated study days  
734 (D). The grey scale represents radiodensity in Hounsfield units (HU). Selected CT images  
735 (axial, sagittal, and coronal views) from the SARS-CoV-2 infected macaques with  
736 detailed radiological descriptions are shown in **Supplementary Figure 3**. Colored arrows  
737 in **Figure 4** and this figure represent regions of interest that are further detailed in figure  
738 legends for **Supplementary Figure 3**. **b)** Percent change in lung hyperdensity (PCLH)  
739 measured over time in the same macaques shown in **Figure 4**, including also here the  
740 mock-infected individual macaques and all study days.

741

742 **Supplementary Figure 3 | Qualitative computed tomography (CT) analysis of**  
743 **macaque lungs.**

744

745 **Supplementary Figure 4 | Qualitative positron emission tomography (PET) and**  
746 **PET/CT analysis of macaque lungs.** Representative coronal (left panels) and axial

## SARS-CoV-2 pulmonary abnormalities in macaques

747 (right panels) 2-deoxy-2-[<sup>18</sup>F]-fluoro-D-glucose (FDG) PET/CT images for each  
748 indicated study day (D). SUV<sub>max</sub>, mean FDG maximum standardized uptake values.  
749 Selected areas of increased FDG uptake are highlighted in the lung parenchyma (yellow  
750 arrows) and regional lymph nodes (pink arrows). Selected merged PET/CT images (axial,  
751 sagittal, and coronal views) with detailed radiological descriptions of these areas of  
752 interest are shown in **Supplementary Figure 5**.

753

754 **Supplementary Figure 5 | Qualitative positron emission tomography (PET) and**  
755 **PET/CT analysis of macaque lungs.**

756

757 **Supplementary Table 1 | Crab-eating macaque (*Macaca fascicularis* Raffles, 1821)**  
758 **information.**

759

760 **Supplementary Table 2 | Macaque physical condition/clinical scoring results.**

761

762 **Supplementary Table 3 | Complete blood cell count (CBC/Diff/Retic) and serum**  
763 **chemistries.**

764

765 **Supplementary Table 4 |Macaque clinical scoring guide.**

## SARS-CoV-2 pulmonary abnormalities in macaques

### 766 **References**

- 767 1. F. Wu *et al.*, A new coronavirus associated with human respiratory disease in  
768 China. *Nature* **579**, 265-269 (2020).
- 769 2. P. Zhou *et al.*, A pneumonia outbreak associated with a new coronavirus of  
770 probable bat origin. *Nature* **579**, 270-273 (2020).
- 771 3. N. Zhu *et al.*, A novel coronavirus from patients with pneumonia in China, 2019.  
772 *N Engl J Med* **382**, 727-733 (2020).
- 773 4. World Health Organization, Coronavirus (COVID-19). <https://who.sprinklr.com/>.  
774 (2020).
- 775 5. X. Yang *et al.*, Clinical course and outcomes of critically ill patients with SARS-  
776 CoV-2 pneumonia in Wuhan, China: a single-centered, retrospective,  
777 observational study. *Lancet Respir Med* **8**, 475-481 (2020).
- 778 6. W. J. Guan *et al.*, Clinical characteristics of coronavirus disease 2019 in China. *N*  
779 *Engl J Med* **382**, 1708-1720 (2020).
- 780 7. X.-W. Xu *et al.*, Clinical findings in a group of patients infected with the 2019  
781 novel coronavirus (SARS-Cov-2) outside of Wuhan, China: retrospective case  
782 series. *BMJ* **368**, m606 (2020).
- 783 8. P. K. Bhatraju *et al.*, Covid-19 in critically ill patients in the Seattle region - case  
784 series. *N Engl J Med*, (2020).
- 785 9. C. Huang *et al.*, Clinical features of patients infected with 2019 novel coronavirus  
786 in Wuhan, China. *Lancet* **395**, 497-506 (2020).

## SARS-CoV-2 pulmonary abnormalities in macaques

- 787 10. S. A. Lauer *et al.*, The incubation period of coronavirus disease 2019 (COVID-  
788 19) from publicly reported confirmed cases: estimation and application. *Ann*  
789 *Intern Med* **172**, 577-582 (2020).
- 790 11. P. Yu *et al.*, Age-related rhesus macaque models of COVID-19. *Animal Model*  
791 *Exp Med* **3**, 93-97 (2020).
- 792 12. C. A. Raptis *et al.*, Chest CT and Coronavirus Disease (COVID-19): A Critical  
793 Review of the Literature to Date. *AJR Am J Roentgenol*, 1-4 (2020).
- 794 13. Y. Pan *et al.*, Epidemiological and clinical characteristics of 26 asymptomatic  
795 SARS-CoV-2 carriers. *J Infect Dis*, (2020).
- 796 14. D. Albano *et al.*, Incidental findings suggestive of Covid-19 in asymptomatic  
797 patients undergoing nuclear medicine procedures in a high prevalence region. *J*  
798 *Nucl Med* **61**, 632-636 (2020).
- 799 15. H. Zhang *et al.*, Histopathologic changes and SARS-CoV-2 immunostaining in  
800 the lung of a patient with COVID-19. *Ann Intern Med* **172**, 629-632 (2020).
- 801 16. Z. Xu *et al.*, Pathological findings of COVID-19 associated with acute respiratory  
802 distress syndrome. *Lancet Respir Med* **8**, 420-422 (2020).
- 803 17. G. Li *et al.*, Multiscale 3-dimensional pathology findings of COVID-19 diseased  
804 lung using high-resolution cleared tissue microscopy. *bioRxiv*,  
805 2020.2004.2011.037473 (2020).
- 806 18. S. E. Fox *et al.*, Pulmonary and cardiac pathology in Covid-19: the first autopsy  
807 series from New Orleans. *medRxiv*, 2020.2004.2006.20050575 (2020).
- 808 19. D. Wichmann *et al.*, Autopsy findings and venous thromboembolism in patients  
809 with COVID-19: a prospective cohort study. *Ann Intern Med*, (2020).

## SARS-CoV-2 pulmonary abnormalities in macaques

- 810 20. L. Bao *et al.*, The pathogenicity of SARS-CoV-2 in hACE2 transgenic mice.  
811 *Nature*, (2020).
- 812 21. J. Shi *et al.*, Susceptibility of ferrets, cats, dogs, and other domesticated animals to  
813 SARS–coronavirus 2. *Science*, eabb7015 (2020).
- 814 22. Y.-I. Kim *et al.*, Infection and rapid transmission of SARS-CoV-2 in ferrets. *Cell*  
815 *Host Microbe*, (2020).
- 816 23. J. F.-W. Chan *et al.*, Simulation of the clinical and pathological manifestations of  
817 coronavirus disease 2019 (COVID-19) in golden Syrian hamster model:  
818 implications for disease pathogenesis and transmissibility. *Clin Infect Dis*, (2020).
- 819 24. Y. Zhao *et al.*, Susceptibility of tree shrew to SARS-CoV-2 infection. *bioRxiv*,  
820 2020.2004.2030.029736 (2020).
- 821 25. W. Deng *et al.*, Ocular conjunctival inoculation of SARS-CoV-2 can cause mild  
822 COVID-19 in Rhesus macaques. *bioRxiv*, 2020.2003.2013.990036 (2020).
- 823 26. B. Rockx *et al.*, Comparative pathogenesis of COVID-19, MERS, and SARS in a  
824 nonhuman primate model. *Science*, eabb7314 (2020).
- 825 27. C. Shan *et al.*, Infection with novel coronavirus (SARS-CoV-2) causes  
826 pneumonia in the rhesus macaques. *Research Square Preprint*  
827 *0.21203/rs.2.25200/v1*, (2020).
- 828 28. S. Lu *et al.*, Comparison of SARS-CoV-2 infections among 3 species of non-  
829 human primates. *bioRxiv*, 2020.2004.2008.031807 (2020).
- 830 29. V. J. Munster *et al.*, Respiratory disease in rhesus macaques inoculated with  
831 SARS-CoV-2. *Nature*, (2020).

## SARS-CoV-2 pulmonary abnormalities in macaques

- 832 30. C. Qin *et al.*, Dysregulation of immune response in patients with COVID-19 in  
833 Wuhan, China. *Clin Infect Dis*, (2020).
- 834 31. X. Cao, COVID-19: immunopathology and its implications for therapy. *Nat Rev*  
835 *Immunol* **20**, 269-270 (2020).
- 836 32. H. Y. F. Wong *et al.*, Frequency and distribution of chest radiographic findings in  
837 COVID-19 positive patients. *Radiology*, 201160 (2019).
- 838 33. M. N. Albaum *et al.*, Interobserver reliability of the chest radiograph in  
839 community-acquired pneumonia. PORT Investigators. *Chest* **110**, 343-350  
840 (1996).
- 841 34. A. Jacobi, M. Chung, A. Bernheim, C. Eber, Portable chest X-ray in coronavirus  
842 disease-19 (COVID-19): a pictorial review. *Clin Imaging* **64**, 35-42 (2020).
- 843 35. M. B. Weinstock *et al.*, Chest x-ray findings in 636 ambulatory patients with  
844 COVID-19 presenting to an urgent care center: a normal chest x-ray is no  
845 guarantee. *J Urgent Care Med* **14**, 13-18 (2020).
- 846 36. L. P. Busby, J. L. Courtier, C. M. Glastonbury, Bias in radiology: the how and  
847 why of misses and misinterpretations. *Radiographics* **38**, 236-247 (2018).
- 848 37. A. P. Brady, Error and discrepancy in radiology: inevitable or avoidable? *Insights*  
849 *Imaging* **8**, 171-182 (2017).
- 850 38. S. E. Seltzer, P. F. Judy, F. Jacobson, R. G. Swensson, U. Feldman, Observer bias  
851 in lung nodule detection with spiral CT. *Academic Radiology* **2**, (1995).
- 852 39. S. Waite *et al.*, Interpretive error in radiology. *AJR Am J Roentgenol* **208**, 739-749  
853 (2017).

## SARS-CoV-2 pulmonary abnormalities in macaques

- 854 40. J. B. Moore, C. H. June, Cytokine release syndrome in severe COVID-19. *Science*  
855 **368**, 473-474 (2020).
- 856 41. L. A. Henderson *et al.*, On the alert for cytokine storm: immunopathology in  
857 COVID-19. *Arthritis Rheumatol*, (2020).
- 858 42. G. Chen *et al.*, Clinical and immunological features of severe and moderate  
859 coronavirus disease 2019. *J Clin Invest* **130**, 2620-2629 (2020).
- 860 43. Q. Ruan, K. Yang, W. Wang, L. Jiang, J. Song, Clinical predictors of mortality  
861 due to COVID-19 based on an analysis of data of 150 patients from Wuhan,  
862 China. *Intensive Care Med* **46**, 846-848 (2020).
- 863 44. X. Li *et al.*, Risk factors for severity and mortality in adult COVID-19 inpatients  
864 in Wuhan. *J Allergy Clin Immunol*, (2020).
- 865 45. R. Byrum *et al.*, paper presented at the American Association for Laboratory  
866 Animal Science 68th National Meeting, Austin, Texas, USA, October 15-19  
867 2017.
- 868 46. S. Lim *et al.*, Bronchoalveolar lavage affects computed tomographic and  
869 radiographic characteristics of the lungs in healthy dogs. *Vet Radiol Ultrasound*  
870 **59**, 564-570 (2018).
- 871 47. M. Kumar *et al.*, Inactivation and safety testing of Middle East Respiratory  
872 Syndrome Coronavirus. *J Virol Methods* **223**, 13-18 (2015).
- 873 48. G. Palacios *et al.*, Panmicrobial oligonucleotide array for diagnosis of infectious  
874 diseases. *Emerg Infect Dis* **13**, 73-81 (2007).
- 875 49. ARTIC NETWORK, hCoV-2019 (nCoV-2019/SARS-CoV-2).  
876 <https://artic.network/ncov-2019>. (2020).

## SARS-CoV-2 pulmonary abnormalities in macaques

- 877 50. D. S. Chertow *et al.*, Influenza A and methicillin-resistant *Staphylococcus aureus*  
878 co-infection in rhesus macaques - A model of severe pneumonia. *Antiviral Res*  
879 **129**, 120-129 (2016).
- 880 51. I. D. Bolton, in *The nonhuman primate in nonclinical drug development and*  
881 *safety assessment*, J. Bluemel, S. Korte, E. Schenck, G. F. Weinbauer, Eds.  
882 (Academic Press, San Diego, CA, USA, 2015), pp. 67-86.
- 883 52. F. Pan *et al.*, Time course of lung changes on chest CT during recovery from 2019  
884 novel coronavirus (COVID-19) pneumonia. *Radiology*, 200370 (2020).
- 885 53. J. Solomon, D. Douglas, R. Johnson, D. Hammoud, in *2014 IEEE 27th*  
886 *International Symposium on Computer-Based Medical Systems*. (2014), pp. 169-  
887 172.
- 888 54. V. Gorbunova *et al.*, Mass preserving image registration for lung CT. *Med Image*  
889 *Anal* **16**, 786-795 (2012).
- 890 55. A. Fedorov *et al.*, 3D Slicer as an image computing platform for the Quantitative  
891 Imaging Network. *Magn Reson Imaging* **30**, 1323-1341 (2012).
- 892 56. D. M. Dudley *et al.*, A rhesus macaque model of Asian-lineage Zika virus  
893 infection. *Nat Commun* **7**, 12204 (2016).
- 894



Figure 1

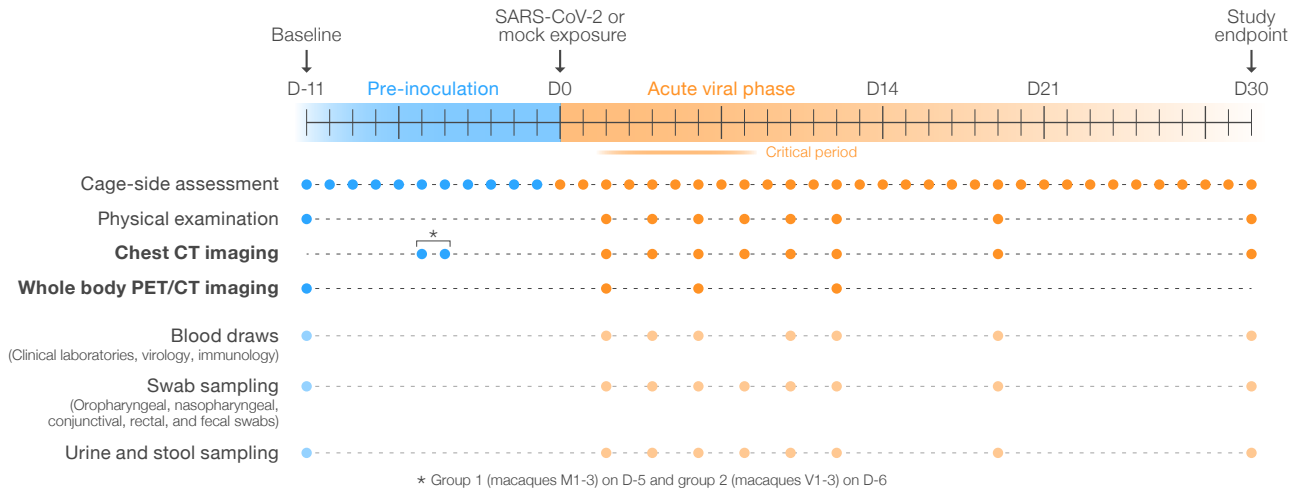

Figure 2

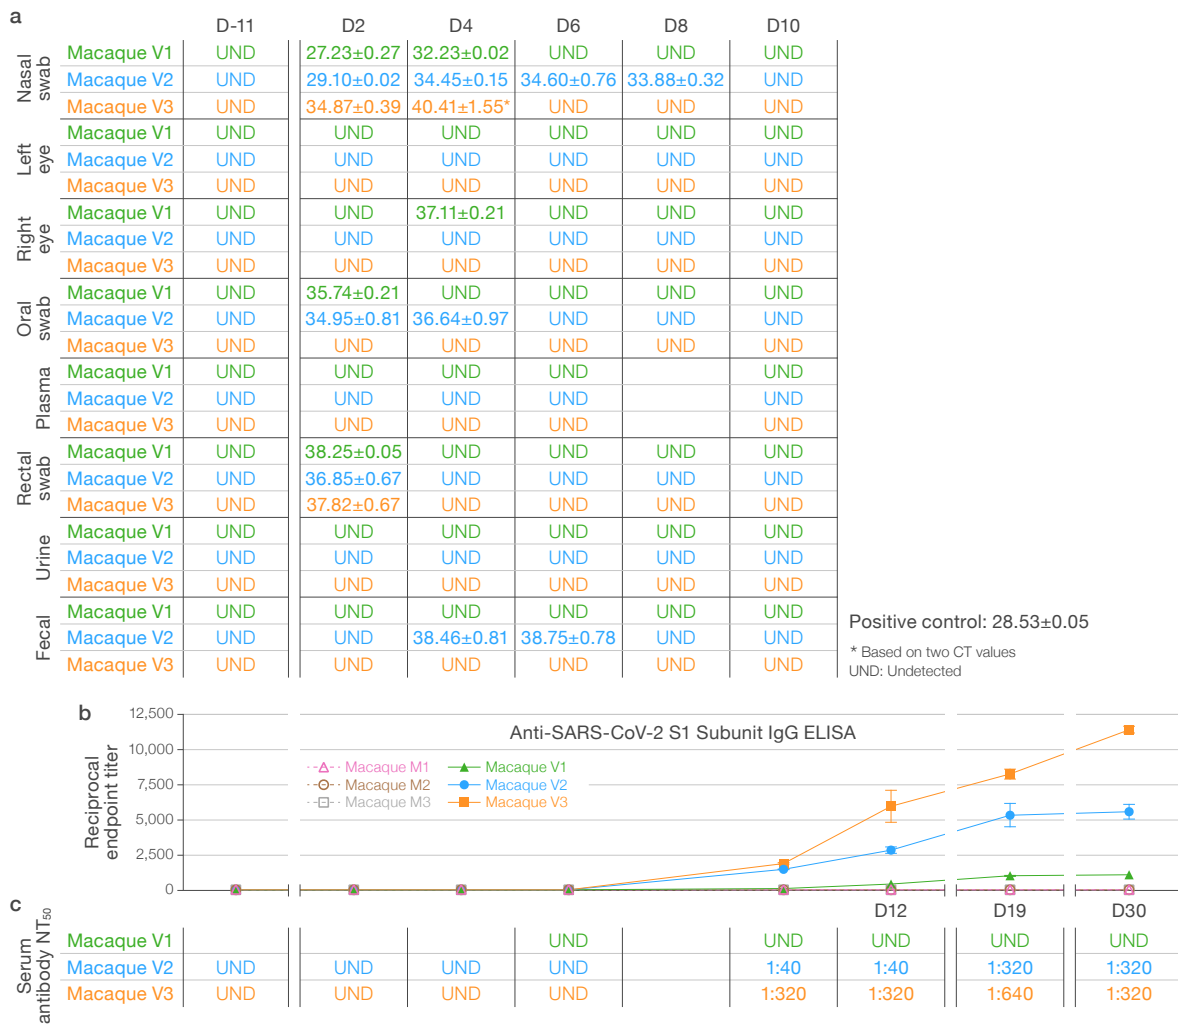

Figure 3

COVID-19-like CT abnormalities in SARS-CoV-2-infected macaques

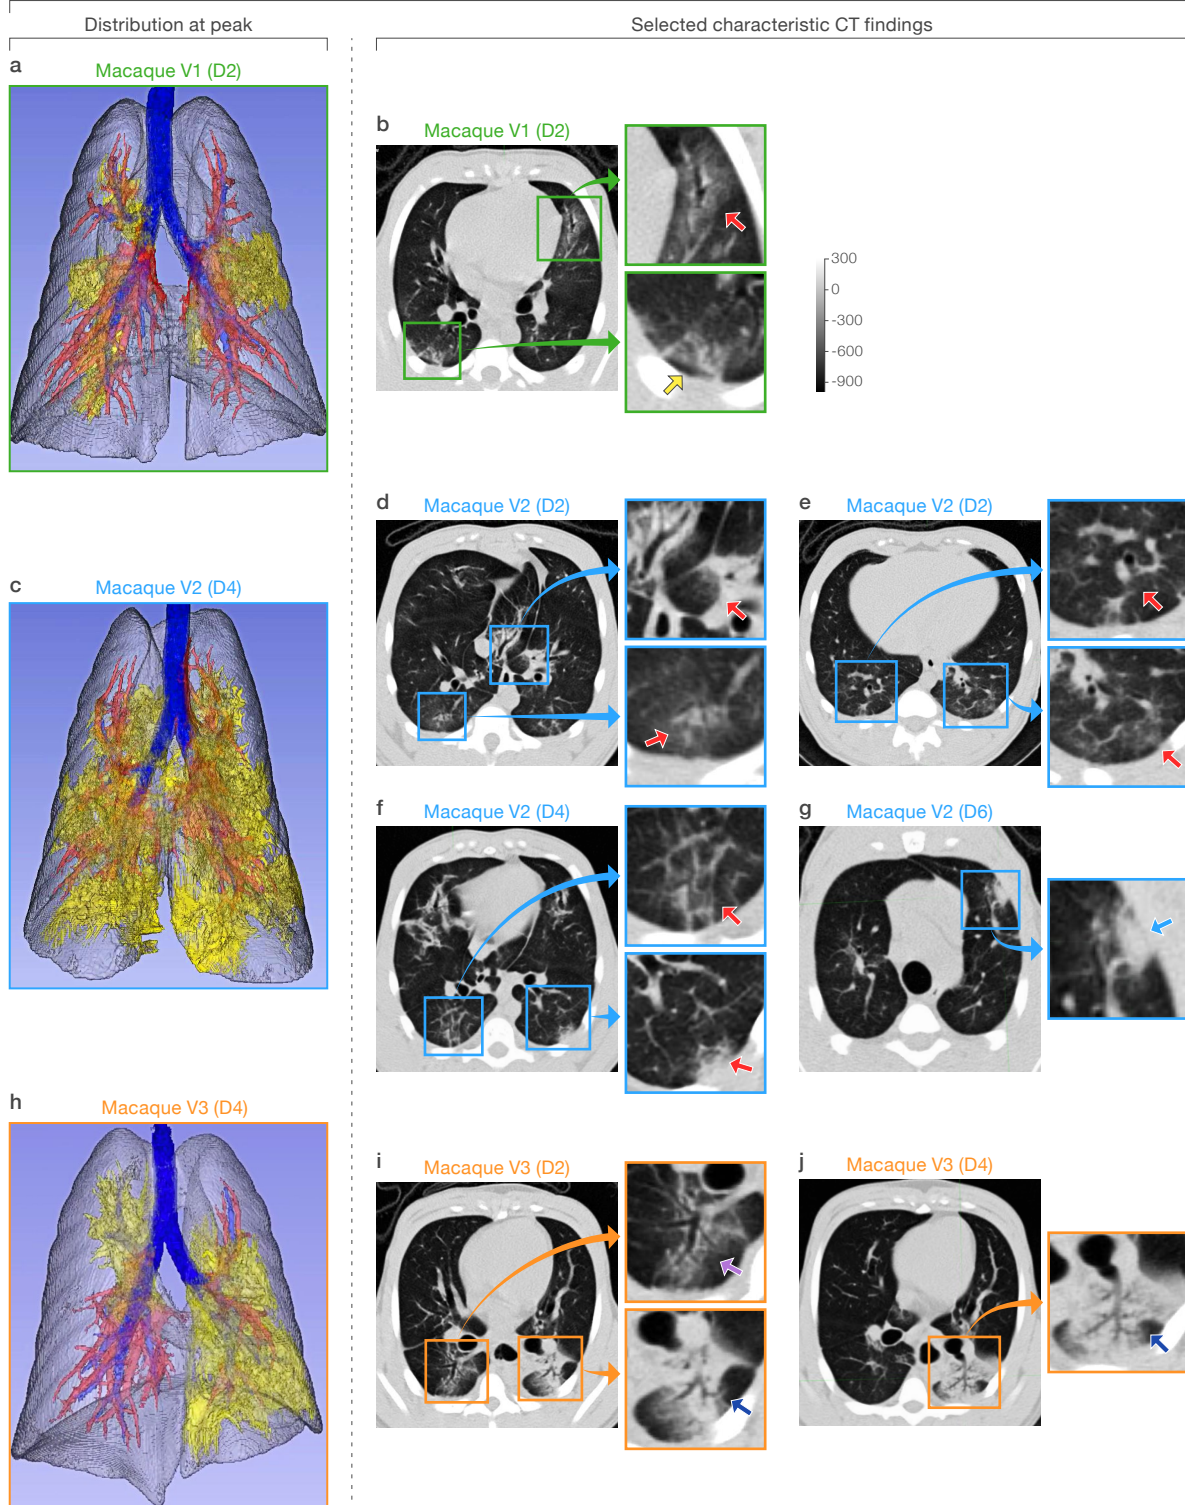

Figure 4

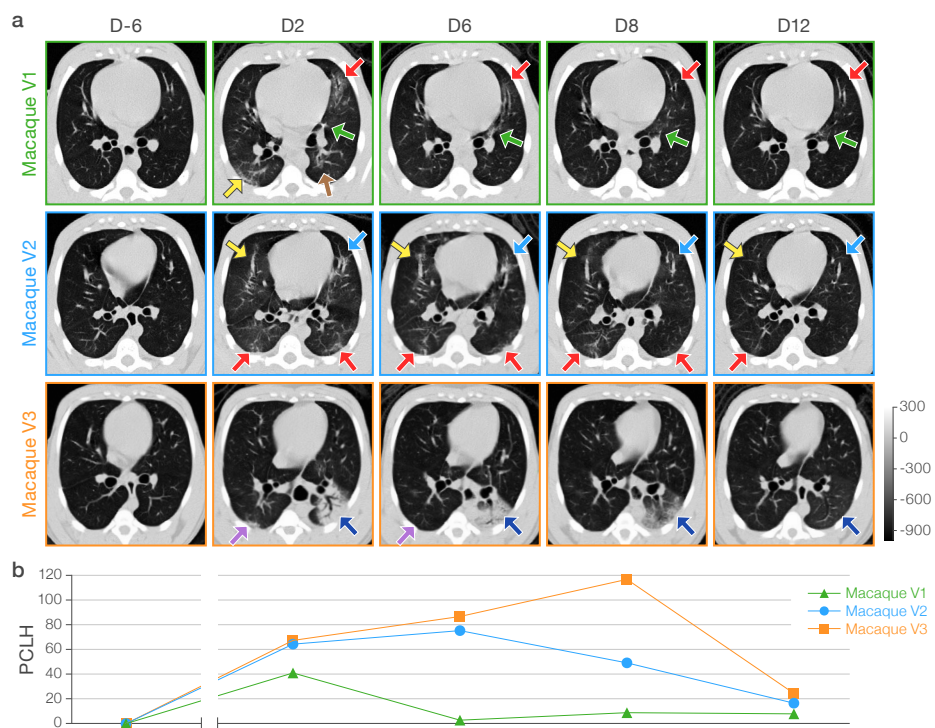

Figure 5

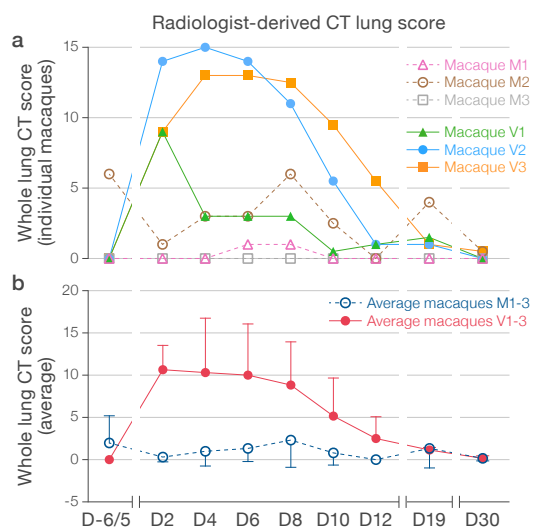

Figure 6

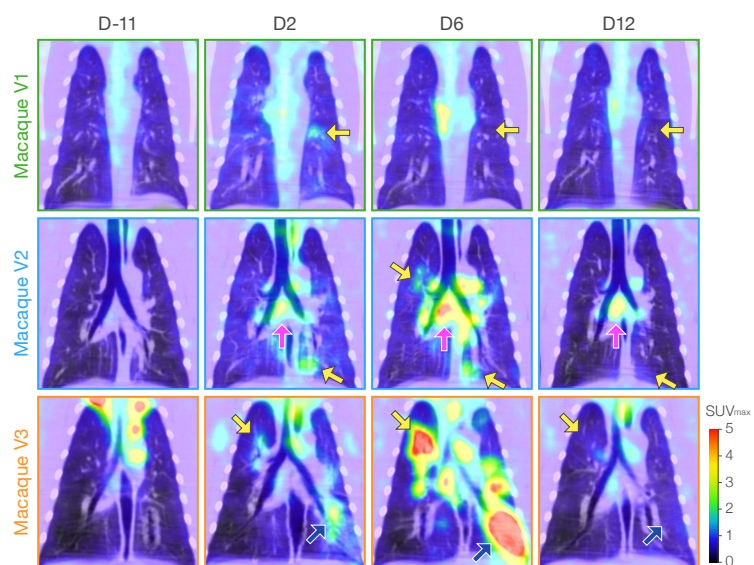

Figure 7

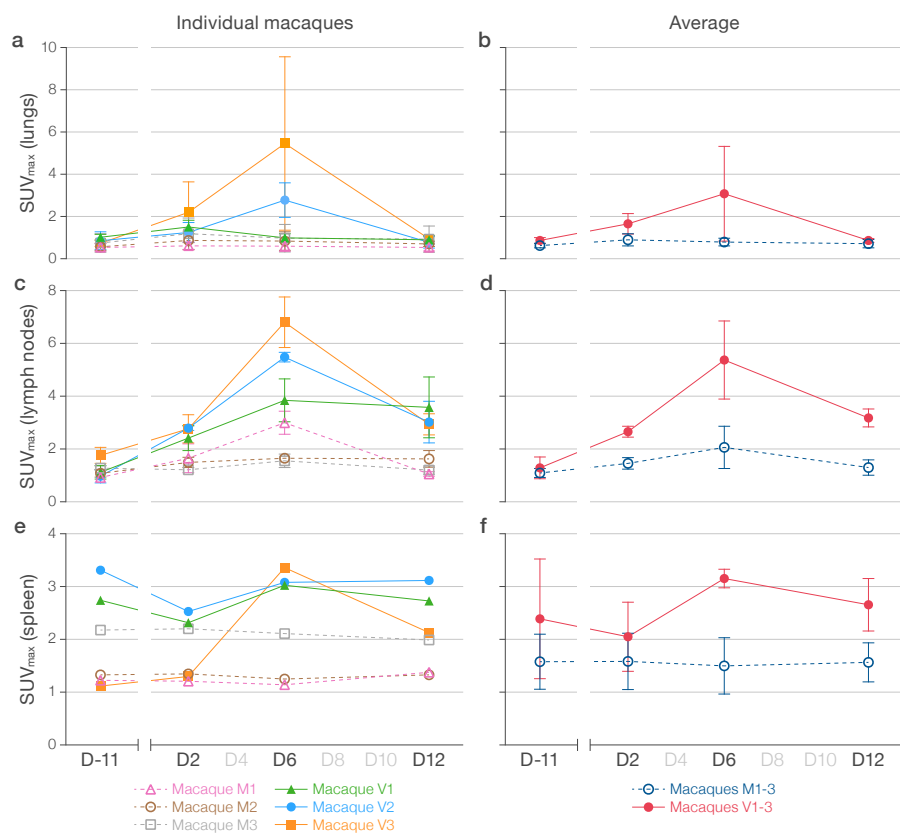

## Figure 8

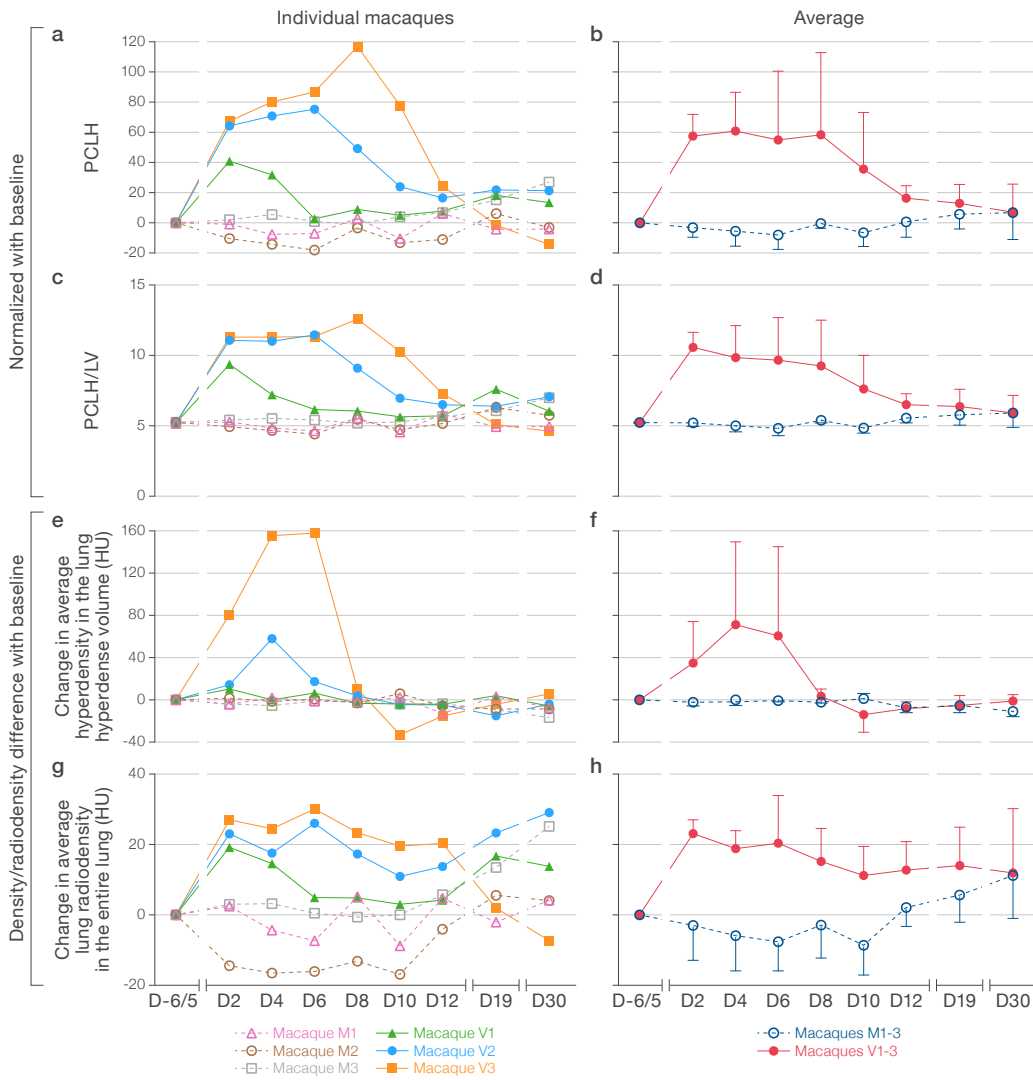

Source: https://www.biorxiv.org/content/10.1101/2020.05.14.096727v1.full.pdf
