# Supplementary material for: Characteristic and quantifiable COVID-19-like abnormalities in CT- and PET/CT-imaged lungs of SARS-CoV-2-infected crab-eating macaques (Macaca fascicularis)
Source: PubMed Central journal article supplement (PMC7241101; doi:10.1101/2020.05.14.096727), 2020-05-14

Supplementary Figure 4

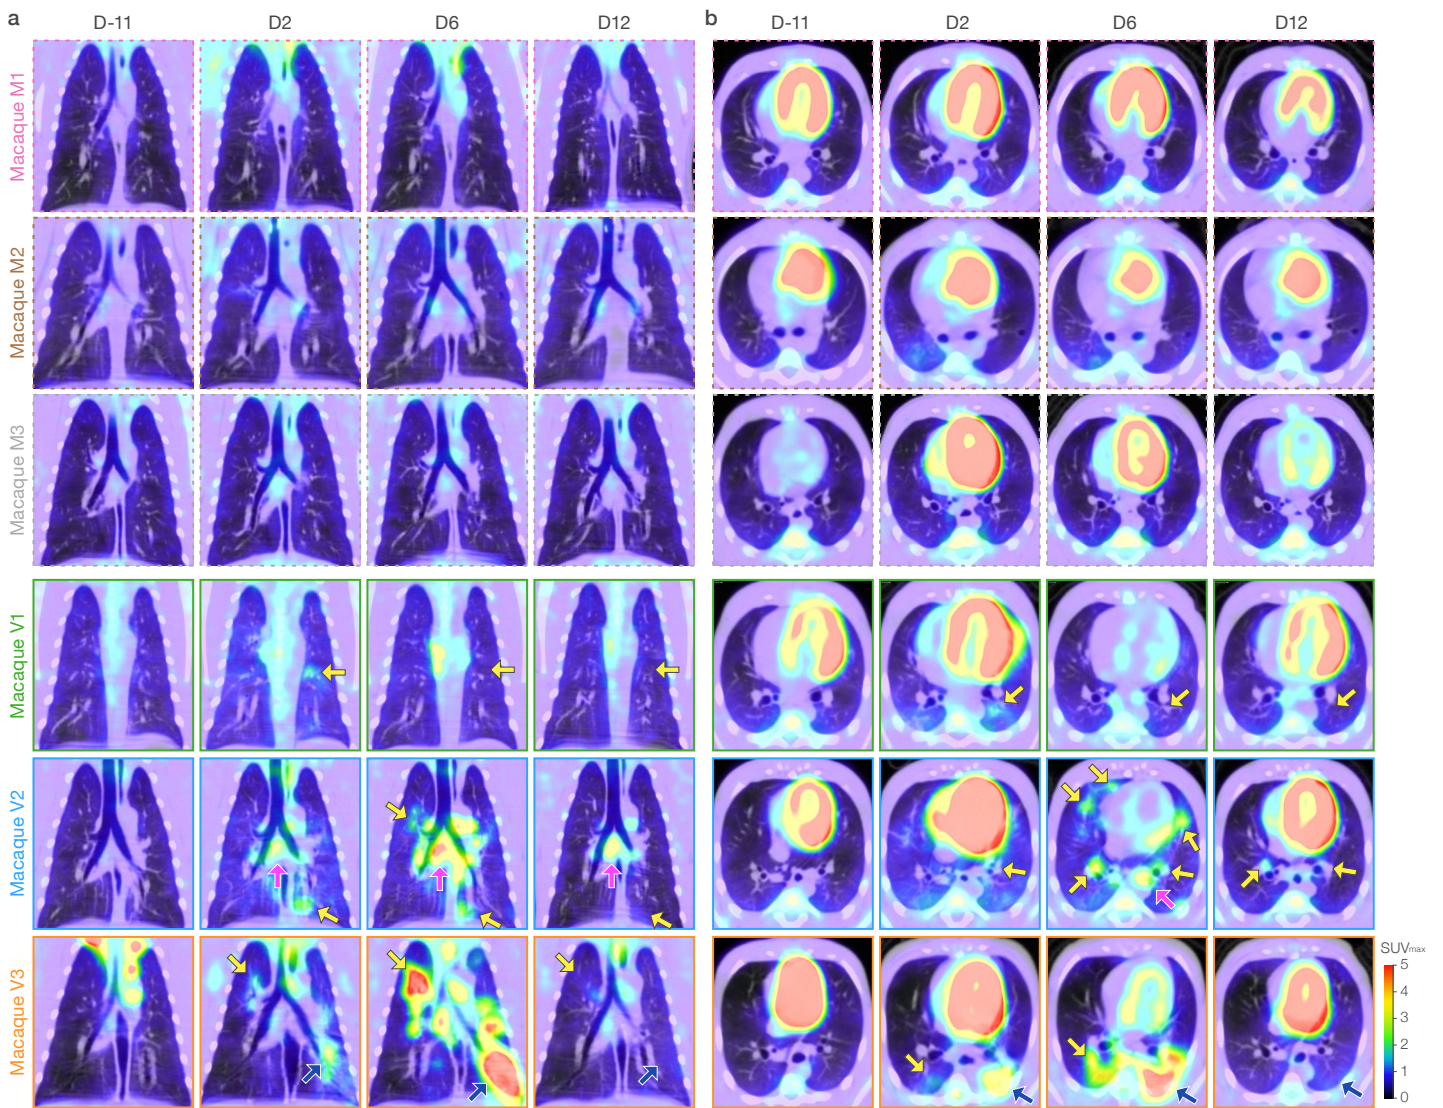

Supplement: media-4.pdf [file media-4.pdf]
