# Supplementary material for: Characteristic and quantifiable COVID-19-like abnormalities in CT- and PET/CT-imaged lungs of SARS-CoV-2-infected crab-eating macaques (Macaca fascicularis)
Source: PubMed Central journal article supplement (PMC7241101; doi:10.1101/2020.05.14.096727), 2020-05-14
Supplement: media-6.pdf [file media-6.pdf]

**Supplementary Table 1 | Crab-eating macaque (*Macaca fascicularis* Raffles, 1821) information**

| <b>Group</b> | <b>Macaque ID</b> | <b>Age</b>        | <b>Weight at baseline (kg)</b> | <b>Sex</b> | <b>Inoculum</b>                                                      |
|--------------|-------------------|-------------------|--------------------------------|------------|----------------------------------------------------------------------|
| Mock (M)     | M1                | 4 years 4 months  | 3.29                           | F          | DMEM + 2% heat-inactivated FBS                                       |
|              | M2                | 3 years 11 months | 3.17                           | F          |                                                                      |
|              | M3                | 3 years 9 months  | 4.87                           | M          |                                                                      |
| Virus (V)    | V1                | 4 years 3 months  | 4.34                           | M          | DMEM + 2% heat-inactivated FBS + 3.65x10 <sup>6</sup> pfu SARS-CoV-2 |
|              | V2                | 4 years           | 4.62                           | M          |                                                                      |
|              | V3                | 4 years 4 months  | 3.17                           | F          |                                                                      |
