# Supplementary material for: Characteristic and quantifiable COVID-19-like abnormalities in CT- and PET/CT-imaged lungs of SARS-CoV-2-infected crab-eating macaques (Macaca fascicularis)
Source: PubMed Central journal article supplement (PMC7241101; doi:10.1101/2020.05.14.096727), 2020-05-14
Supplement: media-9.pdf [file media-9.pdf]

## Clinical Scoring

| <b>Cage-Side Assessment</b>                                                                |                                                                                                                                                      |              |  |
|--------------------------------------------------------------------------------------------|------------------------------------------------------------------------------------------------------------------------------------------------------|--------------|--|
| <b>Parameter</b>                                                                           | <b>Description</b>                                                                                                                                   | <b>Score</b> |  |
| Responsiveness and recumbency                                                              | Normal—bright, alert, responsive                                                                                                                     | 0            |  |
|                                                                                            | Mild—slightly depressed, acts disinterested when personnel in room, lying down in cage but gets up when approached                                   | 2            |  |
|                                                                                            | Moderate/obtunded—non-responsive, very disinterested in personnel, hunched or lying down, will get up when prodded, pinched, or similarly stimulated | 4            |  |
|                                                                                            | Severe/comatose—lying down completely unresponsive to stimuli                                                                                        | 6            |  |
| Discharges                                                                                 | Nasal or ocular                                                                                                                                      | 2            |  |
|                                                                                            | Nasal and ocular                                                                                                                                     | 4            |  |
| Skin                                                                                       | Rash                                                                                                                                                 | 1            |  |
| Respiration, dyspnea, and cough                                                            | Normal—no apparent changes in breathing, 30–54 breath per minute (BPM), and no cough                                                                 | 0            |  |
|                                                                                            | Mild—slightly increased effort breathing, 55–65 BPM, or mild cough                                                                                   | 2            |  |
|                                                                                            | Moderate—obvious difficulty breathing, 66–80 BPM, or apparent cough                                                                                  | 4            |  |
|                                                                                            | Severe—respirations labored, open mouth breathing, abdominal breathing, >80 BPM, cyanosis, or hemoptysis                                             | 6            |  |
| Food consumption                                                                           | 100% of biscuits                                                                                                                                     | 0            |  |
|                                                                                            | 10–25% of biscuits remaining                                                                                                                         | 1            |  |
|                                                                                            | 25–50% of biscuits remaining                                                                                                                         | 2            |  |
|                                                                                            | >50% of biscuits remaining                                                                                                                           | 3            |  |
| Fecal consistency                                                                          | Normal                                                                                                                                               | 0            |  |
|                                                                                            | Soft                                                                                                                                                 | 1            |  |
|                                                                                            | Fluid                                                                                                                                                | 2            |  |
|                                                                                            | Fluid and profuse amount                                                                                                                             | 3            |  |
| <b>Total</b>                                                                               |                                                                                                                                                      |              |  |
| <b>Notes</b> (any observed sneezing, vomit, conjunctival erythema, or other abnormalities) |                                                                                                                                                      |              |  |

| Physical Examination Under Anesthesia                           |                                                     |       |              |
|-----------------------------------------------------------------|-----------------------------------------------------|-------|--------------|
| Parameter                                                       | Description                                         | Score |              |
| Rectal temperature<br><i>(taken immediately after sedation)</i> | Normal (37.0–38.9°C)                                | 0     |              |
|                                                                 | Low-grade fever (39–39.5°C)                         | 2     |              |
|                                                                 | Fever (>39.5°C)                                     | 4     |              |
| Heart rate                                                      | Normal (up to 19 BPM over baseline, ***/***)        | 0     |              |
|                                                                 | Mild tachycardia (20–39 BPM over baseline),         | 1     |              |
|                                                                 | Moderate tachycardia (40–69 BPM over baseline)      | 2     |              |
|                                                                 | Severe tachycardia (>70 BPM over baseline)          | 3     |              |
| Respiratory rate                                                | Normal—30–54 BPM                                    | 0     |              |
|                                                                 | Mild tachypnea—55–65 BPM                            | 2     |              |
|                                                                 | Moderate tachypnea—66–80 BPM                        | 4     |              |
|                                                                 | Severe tachypnea—>80 BPM                            | 6     |              |
| SpO <sub>2</sub>                                                | Normal (95–100%)                                    | 0     |              |
|                                                                 | Mildly decreased (90–94%)                           | 1     |              |
|                                                                 | Moderately decreased (87–89)                        | 2     |              |
|                                                                 | Severely decreased (<87)                            | 3     |              |
| Body weight                                                     | Normal (0–3% loss)                                  | 0     |              |
|                                                                 | Mild (4–9% loss)                                    | 1     |              |
|                                                                 | Moderate (10–16% loss)                              | 2     |              |
|                                                                 | Severe (>16% loss)                                  | 3     |              |
| Dehydration                                                     | Normal skin turgor, moist mucous membranes          | 0     |              |
|                                                                 | Skin tenting or dry mucous membranes                | 1     |              |
|                                                                 | Skin tenting and dry mucous membranes               | 2     |              |
|                                                                 | Skin tenting, dry mucous membranes, and sunken eyes | 3     |              |
|                                                                 |                                                     |       | <b>Total</b> |

**Notes** (*auscultation findings if applicable, conjunctival erythema, palpable masses, or any other abnormalities*)

The sheets above were modified from a previous nonhuman primate influenza A virus study to include clinical signs relevant to COVID-19 and respiratory rates for crab-eating macaques ([1-3](#)). Physical examinations were performed whenever an animal was anesthetized.

## References

1. D. S. Chertow *et al.*, Influenza A and methicillin-resistant *Staphylococcus aureus* co-infection in rhesus macaques - A model of severe pneumonia. *Antiviral Res* **129**, 120-129 (2016).
2. I. D. Bolton, in *The nonhuman primate in nonclinical drug development and safety assessment*, J. Bluemel, S. Korte, E. Schenck, G. F. Weinbauer, Eds. (Academic Press, San Diego, CA, USA, 2015), pp. 67-86.
3. C. Huang *et al.*, Clinical features of patients infected with 2019 novel coronavirus in Wuhan, China. *Lancet* **395**, 497-506 (2020).
